1 **Neocortical layer 4 in adult mouse differs in major cell types**  
2 **and circuit organization between primary sensory areas**

3

4 Scala F.<sup>\*1,2</sup>, Kobak D.<sup>\*3</sup>, Shan S.<sup>1,2</sup>, Bernaerts Y.<sup>3</sup>, Laturus S.<sup>3</sup>, Cadwell C.R.<sup>4</sup>, Hartmanis L.<sup>5</sup>,  
5 Castro J.<sup>1,2</sup>, Tan Z.H.<sup>1,2</sup>, Sandberg R.<sup>5</sup>, Berens P.<sup>3,6</sup>, Jiang X.<sup>1,2,7</sup>, Tolia A.S.<sup>1,2,8</sup>

6

7 <sup>1</sup> Department of Neuroscience, Baylor College of Medicine, Houston, TX, USA

8 <sup>2</sup> Center for Neuroscience and Artificial Intelligence, Baylor College of Medicine, Houston,  
9 Texas, USA

10 <sup>3</sup> Institute for Ophthalmic Research, University of Tübingen, Tübingen, Germany

11 <sup>4</sup> Department of Anatomic Pathology, University of California San Francisco, San Francisco, CA,  
12 USA

13 <sup>5</sup> Department of Cell and Molecular Biology, Karolinska Institutet, Stockholm, Sweden

14 <sup>6</sup> Department of Computer Science, University of Tübingen, Tübingen, Germany

15 <sup>7</sup> Jan and Dan Duncan Neurological Research Institute at Texas Children's Hospital, Houston,

16 <sup>8</sup> Department of Electrical and Computational Engineering, Rice University, Houston, Texas,  
17 USA

18

19 \* Equally contributed

20 Corresponding authors: Andreas S Tolia [astolias@bcm.edu](mailto:astolias@bcm.edu)

21

## 22 **Abstract**

23 Layer 4 (L4) of mammalian neocortex plays a crucial role in cortical information processing, yet  
24 a complete census of its cell types and connectivity remains elusive. Using whole-cell  
25 recordings with morphological recovery, we identified one major excitatory and seven inhibitory  
26 types of neurons in L4 of adult mouse visual cortex (V1). Nearly all excitatory neurons were  
27 pyramidal and almost all Somatostatin-positive (SOM<sup>+</sup>) neurons were Martinotti cells. In  
28 contrast, in somatosensory cortex (S1), excitatory cells were mostly stellate and SOM<sup>+</sup> cells  
29 were non-Martinotti. These morphologically distinct SOM<sup>+</sup> interneurons correspond to different  
30 transcriptomic cell types and are differentially integrated into the local circuit with only S1 cells  
31 receiving local excitatory input. Our results challenge the classical view of a canonical  
32 microcircuit repeated through the neocortex. Instead we propose that cell-type specific circuit  
33 motifs, such as the Martinotti/pyramidal pair, are optionally used across the cortex as building  
34 blocks to assemble cortical circuits.

## 35 **Main**

36 The mammalian sensory neocortex is organized in a six-layered structure. In this stereotypical  
37 architecture, layer 4 (L4) is the main target of sensory inputs coming from the thalamus, thus  
38 acting as the first level of cortical processing for sensory signals. Understanding how L4  
39 implements its computations requires to characterize the diversity of its constituent neuronal  
40 components and the connectivity among them.

41  
42 Most previous studies of L4 have focused on primary somatosensory cortex (S1) of young rats  
43 and mice. Spiny stellate cells have been reported to be the dominant excitatory neural type,  
44 both in rat <sup>1,2</sup> and in mouse after postnatal day five (as a result of sculpting of initially pyramidal  
45 neurons during development) <sup>3</sup>. In contrast, inhibitory interneurons are highly diverse in terms of  
46 their genetic markers, morphologies and electrophysiological properties. Previous studies have  
47 reported three types of fast-spiking (FS), parvalbumin-positive (PV<sup>+</sup>) interneurons <sup>4</sup> and five  
48 types of non-FS interneurons <sup>5</sup>, all of which have distinct morphologies. Several recent studies  
49 revealed that the somatostatin-positive (SOM<sup>+</sup>) interneurons form a single morphological  
50 population that has been called non-Martinotti cells <sup>6</sup> since their axons mainly target L4 <sup>7,8</sup>, in  
51 contrast to typical Martinotti cells, which target L1. Interneuron types exhibit type-specific  
52 connectivity patterns. For example, PV<sup>+</sup> FS interneurons receive thalamic inputs <sup>9-13</sup> but SOM<sup>+</sup>  
53 non-FS interneurons do not <sup>14</sup>. Both groups are reciprocally connected to local excitatory  
54 neurons and between each other <sup>4,8,10,12,15,16</sup>, but PV<sup>+</sup> inhibit each other while SOM<sup>+</sup> do not <sup>17</sup>.

55  
56 Since most of these detailed studies were performed in S1 of young animals, it is unclear  
57 whether the cellular components of L4 and their connectivity profile are the same in other  
58 cortical areas and in adult animals. Recent large-scale studies of transcriptomic cell types in  
59 mouse and human cortex showed that most interneuron types are shared between cortical  
60 areas while the excitatory types are predominantly area-specific <sup>18,19</sup>. In line with this, a recent

61 study suggested a possible lack of spiny stellate cells in L4 of mouse primary visual cortex (V1)  
62 <sup>20</sup>, in contrast to S1 L4. However, there has been no systematic comparisons of morphologies,  
63 electrophysiological properties and connectivity profiles between L4 of different cortical areas,  
64 leaving an open question about the similarity in their cellular components and circuitry.

65

66 To address this question, we used mouse V1 L4 as a model to compare with S1 L4. We  
67 performed a thorough census of the morphologically defined cell types in V1 L4 of adult mice  
68 (older than postnatal day 60, >p60) using multicellular simultaneous whole-cell recordings  
69 combined with post-hoc morphological recovery <sup>21</sup>. We identified several key differences in the  
70 cellular composition of L4 in V1 compared to S1, which we verified using targeted recordings of  
71 certain cell types in adult mouse S1 L4. In addition, we mapped some of the observed  
72 morphological cell types to a reference transcriptomic cell type atlas <sup>18</sup> using Patch-seq <sup>22-24</sup>. We  
73 further investigated the local connectivity profiles in both V1 and S1, finding similarities as well  
74 as some important differences in their circuitry.

## 75 **Results**

### 76 **Morphologically defined cell types in L4 of adult mouse visual cortex**

77 We characterized the electrophysiological and morphological features of L4 neurons in V1 of  
78 adult mice ( $\geq 2$  months old,  $n=129$ ) using whole-cell patch-clamp recordings combined with post-  
79 hoc morphological recovery (see Methods). Altogether, we recovered and analyzed the  
80 morphology of  $n=1174$  neurons (578 excitatory, 596 inhibitory).

81

82 Out of the 578 excitatory cells, 573 (99.1%) were pyramidal neurons (PYR), characterized by  
83 apical dendrites extending into layer 1 (L1), consistent with one previous study<sup>20</sup>. These  
84 neurons did not show a complex arborization in L1, differing from typical layer 5 (L5) pyramidal  
85 neurons which generally have a prominent tuft<sup>25–27</sup> (Fig. 1A). Only five (0.9%) of the excitatory  
86 neurons were classified as spiny stellate cells based on the absence of the apical dendrites  
87 extending out of L4 to supragranular layers. These stellate cells had symmetrical non-polarized  
88 dendritic structure<sup>1</sup> (Fig. 2A). The prevalence of PYRs among excitatory neurons in L4 of V1  
89 was further supported by the fact that all labeled neurons recorded in Scnn1a-Cre/Ai9 mice  
90 ( $n=5$ ), in which excitatory neurons in L4 are selectively labeled<sup>28,29</sup>, were morphologically  
91 confirmed as PYRs (100%, 30/30). In terms of electrophysiology, PYRs exhibited large action  
92 potential (AP) width, high AP amplitude, and shallow afterhyperpolarization (AHP) which clearly  
93 discriminate them from GABAergic interneurons (Fig. 2, S1, S2).

94

95 Interneurons showed a greater variability in both morphological and electrophysiological  
96 features. We used *Viaat-Cre/Ai9* mice ( $n=47$ ) to target GABAergic interneurons<sup>30,21</sup>. Almost all  
97 labeled neurons recorded from these mice (95.5%, 234/245) were morphologically confirmed as  
98 interneurons, with only a small fraction (4.5%) of PYRs. On the other hand, all unlabeled  
99 neurons ( $n=133$ ) were morphologically confirmed as excitatory neurons, suggesting that the

100 entire population of interneurons in L4 was labeled in this Cre line. We identified seven different  
 101 GABAergic cells types (Fig. 1) based on their morphology, following a widely used classification  
 102 scheme based on the axonal geometry and projection patterns<sup>21,31-33</sup>: basket cells (BCs),  
 103 Martinotti cells (MCs), bipolar cells (BPCs), neurogliaform cells (NFCs), shrub cells (SCs),  
 104 double-bouquet cells (DBC), and horizontally elongated cells (HECs). These morphological  
 105 types varied greatly in abundance (Fig. 1) and electrophysiological properties (Fig. 2, S2).

106  
 107

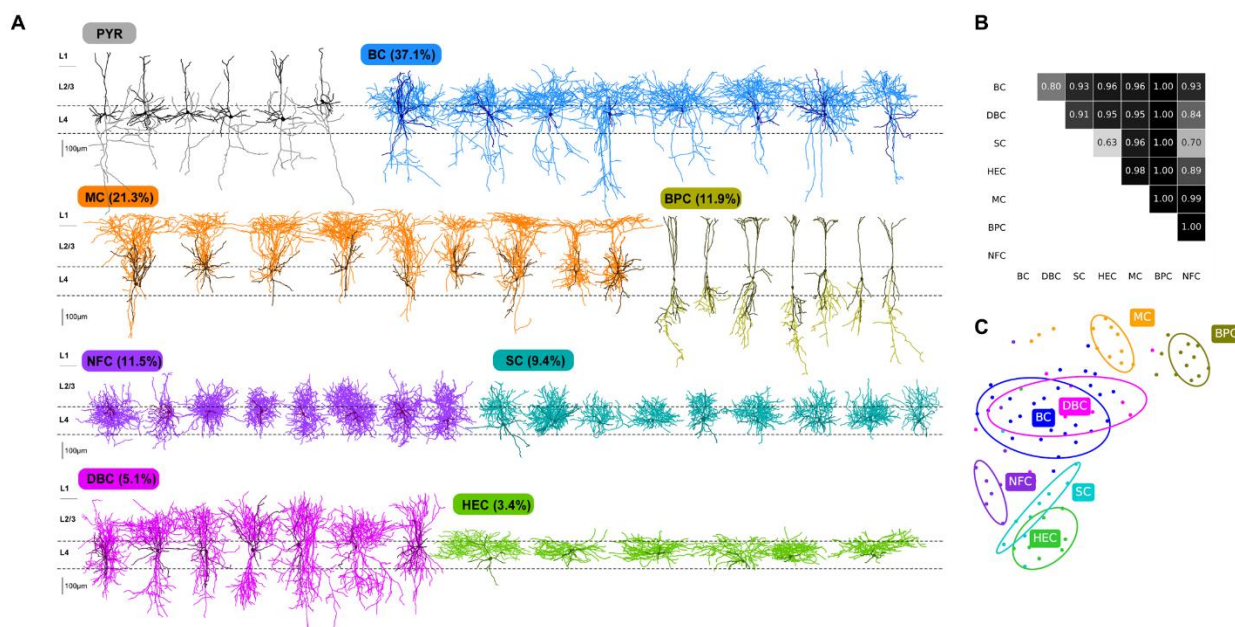

108

109 **Figure 1: Morphologically defined neural types in V1 L4. (A)** Representative morphologies for each  
 110 cell type. The dendrites are shown in a darker shade of color and the axons in a lighter shade. For each  
 111 interneuron type, its proportion among the morphologically identified interneurons in *Viaat-Cre/Ai9* mice is  
 112 indicated. **(B)** Cross-validated pairwise classification accuracy (using regularized logistic regression on a  
 113 diverse set of morphological features) for each pair of cell types. Total sample size  $n=92$ . **(C)** 2D  
 114 visualisation of the same  $n=92$  cells in the space of morphological features using t-SNE. Ellipses show  
 115 80% coverage assuming 2D Gaussian distributions and using robust estimates of the mean and the  
 116 covariance (i.e. ellipses do not include outliers).

117

118

119 BCs were the most abundant interneuron type (34.6%, 88/234). Somata of these neurons were  
120 usually larger than those of other L4 neurons. Their dendrites projected vertically in a bi-tufted  
121 manner, without a complex horizontal structure. The most salient morphological feature of BCs  
122 was a thick axon originating from the apical side of the soma. It typically projected towards L2/3  
123 before forming a series of major branches that extensively spread above the apical region of the  
124 soma with few branches projecting horizontally and vertically downward to L5. All BCs exhibited  
125 a fast-spiking (FS) firing pattern with narrow AP width and high maximal firing rate (Figs. 2, S2).

126

127 MCs (20%, 47/234) were similar to those previously described both in developing cortex and in  
128 mature cortex in other layers <sup>21,34-36</sup>. They had bi-tufted dendrites with vertically or obliquely  
129 oriented branches. All of them had an ascending axon that projected to L2/3 and L1, where it  
130 ramified horizontally and formed a dense axonal cluster of variable extension. A small subset of  
131 MCs (8.9%, 11 out of all 124 recovered MCs) showed a secondary axonal cluster that  
132 extensively ramified around the soma within L4 (e.g. the last two MCs in Fig. 1). Firing pattern  
133 and electrophysiological properties showed a strong correspondence to L2/3 and L5 MCs  
134 described in both adult <sup>21</sup> and developing cortex <sup>34</sup>. In particular, these neurons were  
135 distinguished from other interneurons by their large membrane time constant (Fig. 2, S2).

136

137 BPCs (12.4%, 29/234) had a small soma and bipolar dendrites projecting to L1 and L5. The  
138 ascending dendrites formed a tuft in L1, similar to the structure of apical dendrites of PYRs.  
139 However, their dendrites lacked dendritic spines. The axon emerged from one of the  
140 descending dendrites and projected predominantly to L5. All BPCs showed an irregular-firing  
141 pattern associated with a high input resistance and large AP amplitude (Fig. 2, S2).

142

143 NFCs (12.7%, 27/234) were characterized by a very thin axon that highly ramified and formed a  
144 dense arborization around cell bodies. These neurons fired late-spiking action potentials with  
145 large AP width and high AP threshold (Fig. 2, S2).

146  
147 SCs (9.4%, 22/234) were similar to the shrub cells that have been previously found in L5 of  
148 adult mouse<sup>21</sup> and small BCs in L2/3 and L4 of young rats<sup>37</sup>. These neurons had non-polarized  
149 dendritic branches mostly residing in L4 and thick axons often emerging from the apical region  
150 of the cell bodies and branching locally around their soma. All SCs exhibited an FS firing pattern  
151 (Fig. 2, S2).

152  
153 DBCs (5.7%, 13/234) had large cell bodies and vertically-oriented bi-tufted dendrites, similar to  
154 BCs. However, unlike BCs, the thick axon emerged often from the bottom of the soma,  
155 projecting shortly towards L5 and forming several branches that projected upwards to L2/3 and  
156 downwards to L5 with variable distances. Notably, the axons of these cells extended also  
157 horizontally into L2/3 and L5, differing slightly from DBCs previously described in L2/3<sup>21</sup>. All  
158 DBCs exhibited an FS firing pattern (Fig. 2, S2).

159  
160 HECs (3.5%, 8/234), with their horizontally extended axonal branches, were similar to the HECs  
161 previously reported in L5<sup>21,38</sup>. In particular, the axon had a thick primary structure that often  
162 emerged from the apical side of the soma and bifurcated into secondary structures that spread  
163 horizontally mostly within L4. All HECs exhibited an FS firing pattern (Fig. 2, S2).

164  
165 We also performed experiments using several additional Cre-lines (parvalbumin-expressing,  
166 PV-Cre/Ai9,  $n=31$ ; somatostatin-expressing, SOM-Cre/Ai9,  $n=14$ ; and expressing vasointestinal  
167 peptide, VIP-Cre/Ai9,  $n=8$ ) to relate genetic markers with morphological cell types (Fig. S3). The  
168 majority of morphologically recovered PV<sup>+</sup> neurons were BCs (77.3%, 126/163 in PV-Cre/Ai9)



169 and the rest were SCs (9.2%, 15/163), DBCs (12.3%, 20/163), and HECs (1.2%, 2/163). The  
170 majority of SOM<sup>+</sup> neurons were typical MCs (91.8%, 56/61 in SOM-Cre/Ai9), while a small  
171 fraction exhibited an FS firing pattern and their morphological features matched those of BCs  
172 (8.2%, 5/61). All VIP<sup>+</sup> neurons in V1 L4 were BPCs (100%, 26/26 in VIP-Cre/Ai9).

173

174 To support our expert classification, we fully reconstructed a subset of neurons from each  
175 inhibitory type ( $n=92$  in total) and trained a regularized logistic regression classifier to  
176 discriminate between each pair of inhibitory cell types (Fig. 1B, see Methods). We used a set of  
177 diverse morphological features (see Methods and Fig. S4) that we recently benchmarked  
178 elsewhere (Laternus et al.; manuscript in preparation). Across all 21 pairs, the average cross-  
179 validated accuracy was 0.92, with most pairs discriminated almost perfectly. However, SC/HEC  
180 and SC/NFC pairs showed only ~0.65 classification accuracy. Visualisation of this dataset with  
181 t-SNE (Fig. 1C) indicated that SC/HEC and SC/NFC types were partially overlapping, as well as  
182 BC/DBC. Overall, this analysis suggests that while most morphological classes can be very well  
183 discriminated, some may be partially overlapping with intermediate cells showing ambiguous  
184 morphology. An important caveat is that low classification accuracy can also be due to an  
185 insufficient sample size.

186

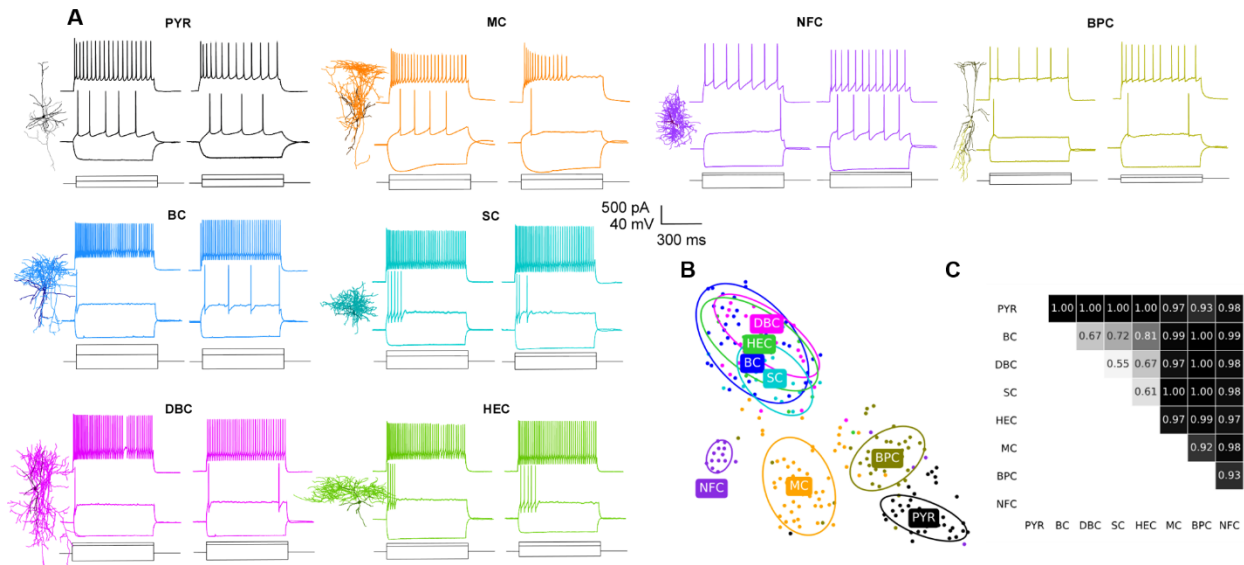

187

188 **Figure 2: Electrophysiology of morphologically defined neural types in V1 L4. (A)** Two exemplary  
 189 electrophysiological traces for each of the eight morphologically defined cell types. The traces were used  
 190 to automatically extract twelve electrophysiological features used for analysis shown in (B) and (C). **(B)**  
 191 2D visualisation of  $n=235$  cells in the space of electrophysiological features using t-SNE. Ellipses show  
 192 80% coverage assuming 2D Gaussian distributions and using robust estimates of the mean and the  
 193 covariance (i.e. ellipses do not include outliers). **(C)** Cross-validated pairwise classification accuracy  
 194 (using regularized logistic regression) for each pair of cell types. Total sample size  $n=235$ .

195

196

197 To further explore variability in firing properties between cell types, we characterized the firing  
 198 pattern of a subset of neurons ( $n=235$ ) using twelve automatically extracted electrophysiological  
 199 features (Fig. S1). Most features exhibited strong differences between cell types (Fig. S2). Two-  
 200 dimensional visualisation of this dataset using t-SNE (Fig. 2B) showed that all four PV<sup>+</sup> cell  
 201 types overlapped in one group of electrophysiologically similar FS neurons, while the other four  
 202 types (PYR, NFC, BPC, and MC) each had distinct firing patterns. We confirmed this using  
 203 pairwise classification with regularized logistic regression (Fig. 2C): the average cross-validated

204 classification accuracy between the FS types was 0.67, while the average accuracy across all  
205 other pairs was 0.98.

206

### 207 **V1 differs from S1 in major L4 cell types**

208 Although spiny stellate cells have been reported to be the predominant excitatory neurons in L4  
209 of monkey, cat, and ferret V1<sup>3,39-42</sup> we found that 98% of excitatory cells in L4 of mouse V1  
210 were PYRs (see above; Fig. 3A), confirming one previous report<sup>20</sup>. This is different from S1  
211 where stellate cells were found to be abundant in L4 of young rats<sup>1,43</sup> and mice<sup>3</sup>. To confirm  
212 that stellate cells were also abundant in S1 V4 of adult mouse, we additionally recovered L4  
213 excitatory cells in S1 ( $n=24$  mice) with the same method as in V1. We found that indeed 76.6%  
214 (85/114) of the recovered spiny neurons did not have a clear apical dendrite and were thus  
215 classified as stellate cells (Fig. 3B). In particular, in Scnn1a-Cre/Ai9 mice ( $n=5$ ), we detected  
216 only four PYRs among twenty six labeled and morphologically recovered excitatory cells (PYR:  
217 15.3%, 4/26; Stellate: 84.7%, 22/26). This confirms that, unlike in V1, stellate cells are the  
218 predominant excitatory population in L4 of adult S1 (Fisher's exact test for difference in the  
219 fraction of stellate cells between V1 and S1:  $p<0.0001$ ; 85/114 vs. 11/585).

220

221 Recent evidence indicates that most, if not all, L4 SOM<sup>+</sup> cells in mouse S1 have axons  
222 restricted within L4, in stark contrast to typical MCs<sup>8</sup>. Indeed, we found that in S1, almost all L4  
223 SOM<sup>+</sup> neurons we recovered had non-MC morphology characterized by a thin, highly ramifying  
224 axon<sup>44</sup> mostly residing within L4 (Fig. 3B). Only two cells showed an ascending axon projecting  
225 to L1 typical of MCs (2/79) and one was characterized by a thick axon branching similarly to BC  
226 with a FS firing pattern (1/79) (Fisher's exact test for difference in the fraction of NMCs between  
227 S1 and V1:  $p<0.0001$ ; 76/79 vs. 0/61). We follow the convention of a previous study<sup>6</sup> and refer  
228 to these SOM<sup>+</sup> neurons that dominate L4 in S1 as non-Martinotti cells (NMCs). These neurons

229 also differed in their firing pattern from MCs recorded in V1: e.g. they had a higher maximal  
230 firing rate (Fig. 4A; see also below).

231

232 To further investigate the differences between MCs in V1 and NMCs in S1, we used the Patch-  
233 seq<sup>22-24</sup> technique combining patch-clamp recordings with single cell transcriptomics. We

234 sequenced RNA of SOM<sup>+</sup> neurons in L4 of V1 and S1 ( $n=71$  after quality control,  $n=36$  in V1

235 and  $n=35$  in S1). We obtained on average 1.1 million reads per cell (median; mean $\pm$ SD on a

236 log<sub>10</sub> scale:  $6.1\pm 0.2$ ) and detected  $6.3\pm 1.6$  thousand (mean $\pm$ SD) genes per cell (Fig. S5). We

237 mapped these cells to a large transcriptomic cell type dataset<sup>18</sup> that contained 21 somatostatin

238 clusters with 2880 neurons from V1 and ALM. The quality of the mapping was equally good for

239 V1 and S1 cells (Fig. S5), suggesting that the V1+ALM dataset is a reasonable reference for S1

240 interneurons. This is in agreement with the idea that inhibitory transcriptomic cell types are

241 shared across cortical regions<sup>18,19</sup>.

242

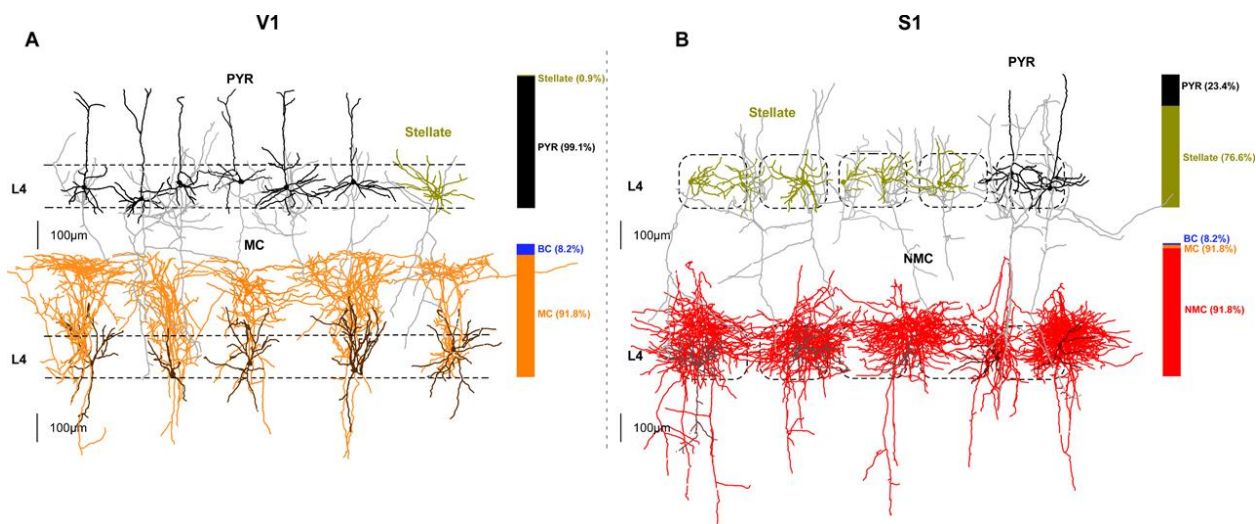

243

244 **Figure 3: V1 differs from S1 in excitatory cells and SOM<sup>+</sup> interneurons in L4. (A)** Representative

245 morphologies of excitatory and SOM<sup>+</sup> neurons in V1 L4. Bar graphs indicate the fractions of each cell

246 type among all morphologically recovered excitatory neurons (top) and all morphologically recovered

247 SOM<sup>+</sup> neurons (bottom). (B) The same in S1 L4. Dashed rectangles represent individual cortical barrels.

248

249

250 Most cells (80%, 57/71) were assigned to one of the two clusters: *Sst Calb2 Pdlim* and *Sst Hpse*  
251 *Cbln4* (Fig. 4B-C), with S1 cells falling almost exclusively into the *Hpse* cluster (27/29) and V1  
252 cells falling preferentially into the *Calb2* cluster (20/28) ( $p < 0.0001$  with Fisher's exact test). This  
253 suggests that *Sst Calb2 Pdlim* is a MC cluster, in agreement with the conclusions of Tasic et al.  
254 <sup>18</sup> based on the data from Paul et al. <sup>45</sup>, and that *Sst Hpse Cbln4* is a NMC cluster, in agreement  
255 with Naka et al. <sup>46</sup> However, this raises the question of why some V1 L4 SOM<sup>+</sup> cells, which all  
256 have MC morphology (see above), had a NMC transcriptomic profile, both among our Patch-seq  
257 cells and in the Tasic et al. dataset.

258

259 To answer this question, we looked at electrophysiological features that were most different  
260 between SOM<sup>+</sup> interneurons in V1 and S1 (Cohen's  $d > 1$ : input resistance, membrane time  
261 constant, maximum firing rate, and AP width) and found that for two of them (input resistance  
262 and membrane time constant) V1 cells belonging to the *Hpse* cluster had values more similar to  
263 the S1 cells than to the V1 cells from the *Calb2* cluster (Fig. 4D). This suggests that  
264 electrophysiologically, V1 *Hpse* MC cells are in between V1 *Calb2* MC cells and S1 NMC cells.

265

266 The relationship between gene expression and electrophysiological features can be visualized  
267 using the sparse reduced-rank regression analysis that we have recently introduced <sup>47</sup>. This  
268 technique aims to reconstruct all the electrophysiological features using a two-dimensional  
269 projection of the expression levels of a small set of genes (Fig. 4E). This analysis supports our  
270 conclusion that V1 *Hpse* MCs are "in between" MCs and NMCs in terms of electrophysiology.  
271 Interestingly, this analysis also shows that cells falling in the *Tac1* and *Mme* clusters tend to  
272 have a distinct firing pattern which is different from firing patterns of MCs and NMCs. These

273 three transcriptomic cell types have recently been identified in Tasic et al. <sup>18</sup>, and do not have  
 274 known morphological or electrophysiological counterparts.

275

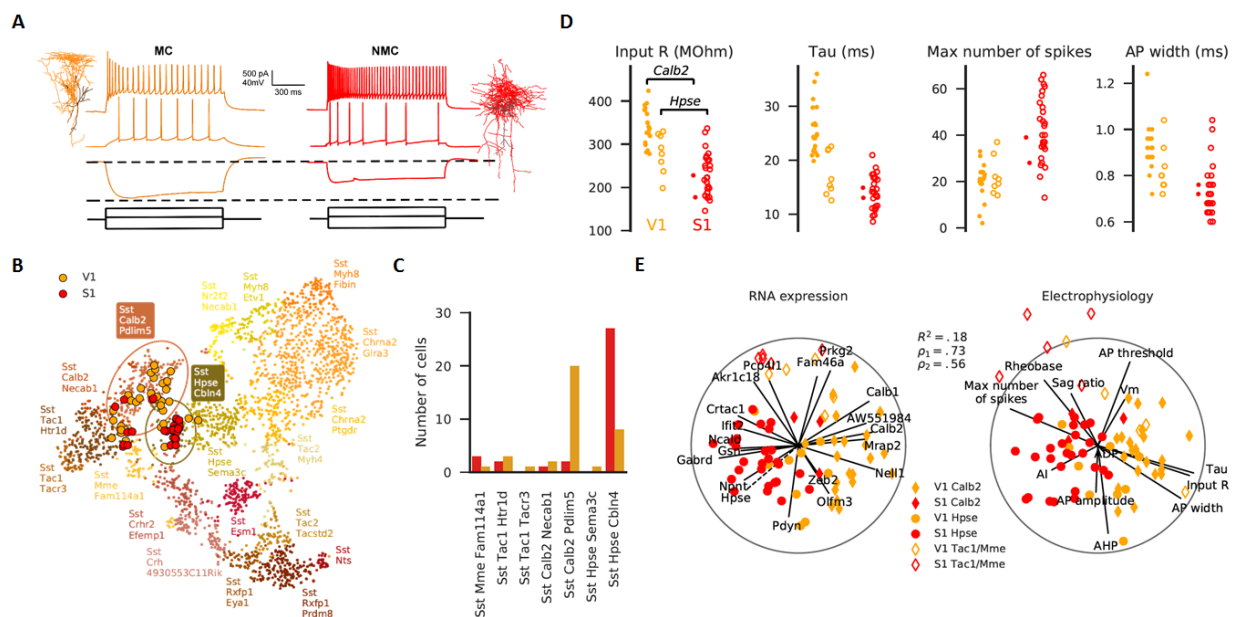

276

277 **Figure 4: SOM<sup>+</sup> interneurons in L4 of V1 and S1 differ in electrophysiological properties and**

278 **transcriptomic profile, as shown by Patch-seq. (A) Morphologies and firing patterns of two exemplary**

279 **cells, from V1 (orange) and S1 (red) respectively. (B) Mapping of the Patch-seq cells ( $n=71$ ) to the t-SNE**

280 **visualization of the transcriptomic diversity among *Sst* clusters from Tasic et al. <sup>18</sup> t-SNE was done on all**

281 **cells from *Sst* clusters except for *Sst Chodl* that is very well separated from the rest (20 clusters;  $n=2701$**

282 **cells), using 500 most variable genes (see Methods). Two ellipses show 90% coverage areas of the two**

283 **clusters where the most Patch-seq cells land. Mapping to t-SNE was performed as we described**

284 **elsewhere <sup>48</sup>, see Methods. (C) Cluster assignment of the Patch-seq cells. There is a very good**

285 **correspondence between (B) and (C). (D) Four electrophysiological features that differed most strongly**

286 **(Cohen's  $d > 1$ ) between V1 and S1 cells. Only cells assigned to *Sst Calb2 Pdlim5* and *Sst Hpse Cbln4***

287 **clusters are shown. Note that the values are not directly comparable to those shown in Fig. S2 because**

288 **Patch-seq experiments used a different internal solution compared to regular patch-clamp experiments**

289 **without RNA extraction. (E) Sparse reduced-rank regression analysis <sup>47</sup>: the left biplot shows two-**

290 **dimensional projection in the transcriptomic space that is optimized to reconstruct the electrophysiological**

291 features. The right biplot shows the corresponding two-dimensional projection in the electrophysiological  
292 space; it should “match” to the left plot if the model is accurate. Color denotes brain area (orange for V1,  
293 red for S1), marker shape denotes transcriptomic cluster that each cell was assigned to (circles for the  
294 two *Hpsc* clusters, diamonds for the two *Calb2* clusters, open diamonds for the three *Tac1/Mme* clusters).  
295 Individual features are depicted with lines showing their correlations to the two components. Circles show  
296 maximal possible correlation.  $R^2$ ,  $\rho_1$ , and  $\rho_2$  refer to cross-validated estimates of the overall R-squared  
297 and correlations between the horizontal and vertical components.

---

298

299

300 We additionally performed Patch-seq recordings of L5 SOM<sup>+</sup> cells in both areas and found that  
301 while they mapped to a different set of transcriptomic clusters than the L4 SOM<sup>+</sup> cells (Fig. S5),  
302 there were no systematic differences between S1 and V1 in terms of transcriptomic cell types.

303

#### 304 **Connectivity among excitatory and SOM<sup>+</sup> neurons in L4 of V1 vs. S1**

305 So far, we have described major differences in the morphology, electrophysiology, and  
306 transcriptomic signatures of excitatory neurons and SOM<sup>+</sup> interneurons in L4 between V1 and  
307 S1. We next investigated whether there are differences in their connectivity profiles as well,  
308 using simultaneous multi-cell patch-clamp recordings. We found that certain connectivity  
309 patterns between them are very similar across both areas (Fig. 5). First, the connection  
310 probabilities among excitatory cells were low in both areas (1.0%, 7/701 in V1; 2.5%, 3/122 in  
311 S1). Second, the connection probabilities between SOM<sup>+</sup> cells were also low in both areas (0%,  
312 0/68 in V1; 3.8%, 2/52 in S1). Third, the connection probabilities from SOM<sup>+</sup> cells to excitatory  
313 cells were high in both areas (21.1%, 30/142 in V1, 26.6%, 17/64 in S1). In addition, despite  
314 their low connectivity via chemical synapses, both MCs in V1 and NMCs in S1 were similarly  
315 often interconnected by gap junctions (MCs: 23.5%, 8/34; NMCs: 30.7%, 8/26; Fig. S6).

316



317 On the other hand, we found a striking difference between the areas in connection probabilities  
318 from excitatory to SOM<sup>+</sup> neurons. In S1, NMCs received facilitating synaptic connections from  
319 local excitatory neurons (12.5%, 8/64), in line with previous studies in young rodents<sup>8,10</sup>. In  
320 contrast, we did not find any connections (0%, 0/142) from local excitatory neurons to MCs in  
321 V1 ( $p=0.0002$ , Fisher's exact test). This was in stark contrast to MCs in L2/3 and L5 of adult  
322 mouse V1, which receive strong input from local PYRs in the same layers<sup>21</sup> (see Discussion for  
323 further considerations).

324

325 In addition, we tested the connectivity pattern of BCs in V1 L4, in order to complete the  
326 connectivity matrix between the three most abundant types: PYRs, BCs, and MCs (Fig. S8). We  
327 found that BCs followed the same connectivity rules as previously found in other layers for  
328 basket cells<sup>21,49</sup>. PYRs connected to BCs with probability 12.5% (38/303), MCs inhibited BCs  
329 with probability 32.6% (15/46), and BCs inhibited each other (36.7%, 75/204), MCs (13.0%,  
330 6/46) and PYRs (25.7%, 78/303). All of these connections have also been reported in S1 L4 of  
331 young mice<sup>17</sup>. We also found that BCs were electrically coupled to each other with probability  
332 27.5% (28/102), in agreement with previous findings that gap junctions exist between inhibitory  
333 cells of the same type<sup>50</sup>.

334

335 Notably, the connection probability between PYRs in V1 L4 was very low, consistent with our  
336 previous work in other layers in adult animals<sup>21</sup>, but in contrast to the findings in young and  
337 juvenile rodents<sup>51,52</sup>. To confirm that this low connectivity reflects an age effect, we measured  
338 the connectivity between PYRs in V1 L4 at different ages (p15-p20 and p30-p40,  $n=5$  each)  
339 using Scnn1a-Cre/Ai9 mice. We found that the connectivity probability monotonically decreased  
340 with age (Fig. S9): from 13.2% in p15-p20 (15/114) to 5.1% in p30-p40 (8/156) to 1.0% in >p60  
341 reported above (7/701).

342



343

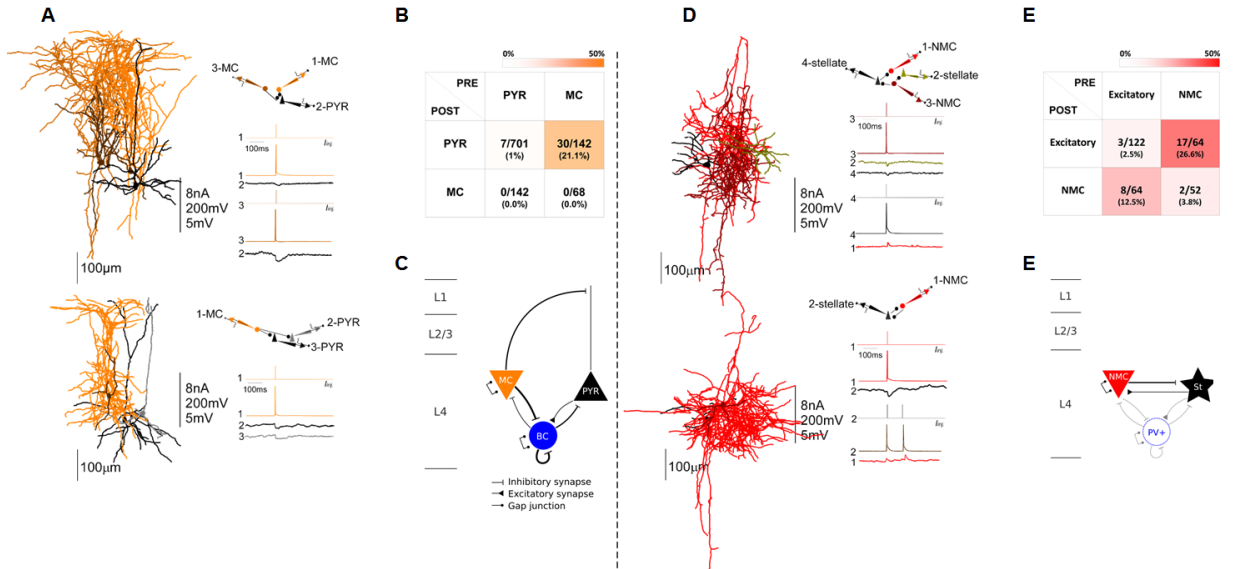

344

345 **Figure 5: Connectivity between excitatory and SOM<sup>+</sup> cells in L4 of V1 and S1. (A)** Examples of  
 346 simultaneous recordings from excitatory and SOM<sup>+</sup> neurons in V1 L4. Recorded neurons were close to  
 347 each other (generally less than 150 $\mu$ m). Vertical scale bar indicates: amplitudes of injected current in nA,  
 348 amplitude of APs in mV and amplitude of uEPSP or uIPSP in mV. **(B)** Color coded connectivity matrix  
 349 shows the connection probability between cell types as a percentage of tested potential connections.  
 350 Average of uEPSP and uIPSP as well as PPR are reported in Fig. S7. **(C)** Schematic of the local circuitry  
 351 in L4 V1. For the connectivity involving BCs, see Fig. S8. For gap junctions, see Fig. S4. Line thickness  
 352 corresponds to connection probability. **(D-F)** The same for L4 S1. In the schematic in panel (F),  
 353 connectivity involving BCs is taken from Ma et al.<sup>17</sup> All these BCs connections are shown with the same  
 354 strength as that study used juvenile (p15) mice and so connection strengths are not directly comparable  
 355 to the values obtained in our experiments. Regarding gap junctions between FS interneurons see also  
 356 50,53.

357

358

359

360

## 361 **Discussion**

362

### 363 **Morphological cell types in L4: V1 vs. S1**

364 We described eight morphological neuronal types in V1 L4 of adult mice as well as the  
365 connectivity patterns of three most abundant cell types. We found that nearly all excitatory  
366 neurons are pyramidal cells, in stark contrast to S1 L4 where the majority of excitatory neurons  
367 are stellate cells<sup>1,3,43</sup>. Interestingly, L4 stellate cells in ferret V1 and mouse S1 develop  
368 postnatally from neurons that resemble pyramidal cells with an upward projecting apical  
369 dendrite<sup>3</sup>. The near absence of stellate cells in V1 L4 of adult mice (as old as 12 months in our  
370 experiments) suggests a different developmental mechanism in this case. One previous study<sup>20</sup>  
371 also reported mostly pyramidal cells in mouse V1 L4, but considered this result indecisive due to  
372 a possible selection bias. Our results in S1 show that selection bias (if any) does not prevent us  
373 from finding stellate cells, and suggest that the observed prevalence of pyramidal cells in adult  
374 V1 L4 is real. It remains an open question, why pyramidal cells in mouse V1 L4 remain  
375 pyramidal, whereas L4 excitatory cells in mouse S1 and in V1 of other non-rodent species  
376 develop into stellate cells.

377

378 We also found that almost all SOM<sup>+</sup> neurons in V1 L4 are Martinotti cells, which is also in  
379 contrast to S1 L4, where almost all SOM<sup>+</sup> neurons are non-Martinotti<sup>7,8</sup>. Using Patch-seq, we  
380 showed that SOM<sup>+</sup> MCs in V1 L4 and SOM<sup>+</sup> NMCs in S1 L4 correspond to two different  
381 transcriptomic cell types (*Sst Calb2 Pdlim* and *Sst Hpse Cbln4* respectively) previously identified  
382 in a large-scale transcriptomic cell atlas<sup>18</sup>.

383

384 We relied on manual expert classification to isolate the morphological types. Unlike in  
385 transcriptomics, where automatic unsupervised clustering is commonplace<sup>18</sup>, morphological

386 studies usually do not use it, because of low numbers of manually reconstructed neurons and  
387 multiple challenges to data analysis of morphological data. One recent study done in parallel to  
388 our work<sup>54</sup> attempted clustering of neural morphologies from all layers of adult mouse V1.  
389 There is a broad agreement between their types from L4 and our types. There are also some  
390 differences: they split abundant types (e.g. PYRs and BPCs) into multiple narrow sub-clusters,  
391 while at the same time missing some rare types such as HECs.

392

### 393 **Transcriptomic types of SOM<sup>+</sup> interneurons in L4: V1 vs. S1**

394 Although MCs and NMCs are morphologically distinct, with no ambiguous morphological forms,  
395 they form more of a continuum in both transcriptomic and electrophysiological space. In the  
396 Tasic et al. reference dataset<sup>18</sup>, the MC and the NMC clusters (*Sst Calb2 Pdlim* and *Sst Hpse*  
397 *Cbln4* respectively), although distinct, were close and partially overlapping in the t-SNE  
398 visualisation (Fig. 4B). Consistent with this, Tasic et al.<sup>18</sup> also found intermediate cells between  
399 the “core” members of these two clusters. We show that, electrophysiologically, MCs and NMCs  
400 also form a continuum (Fig. 4E) with all electrophysiological features having unimodal  
401 distributions (Fig. 4D). This is in agreement with the findings of Naka et al.<sup>46</sup> who demonstrated  
402 an electrophysiological continuum between NMCs in S1 L4 and MCs in S1 L5. How these cells  
403 develop sharply distinct morphologies given overlapping transcriptomic and electrophysiological  
404 profiles, is an interesting open question.

405

406 Even though we did not identify any NMCs in V1, the transcriptomic reference dataset<sup>18</sup>  
407 contained many V1 cells from the *Sst Hpse Cbln4* cluster, and we found that some MCs from  
408 V1 had transcriptomic profile mapping to this cluster. These cells show an electrophysiological  
409 profile intermediate between MCs and NMCs, but morphologically correspond to MCs based on  
410 our data. We hypothesize that these cells may be “latent NMCs”, present in V1, but failing to  
411 develop a NMC morphology due to the nearly complete absence of stellate cells in V1. Tasic et

412 al.<sup>18</sup> showed that the majority of transcriptomic inhibitory types are shared between two very  
413 different cortical areas (V1 and ALM). Our findings demonstrate that this does not necessarily  
414 imply that morphological types are also all shared.

415  
416 Using Patch-seq, we also performed single-cell RNA-sequencing on a small number of L5  
417 SOM<sup>+</sup> cells in both S1 and V1. Morphologically, all L5 SOM<sup>+</sup> cells in these two cortical areas are  
418 known to be MCs<sup>21,46</sup>. We found that they had electrophysiological features similar to L4 MCs  
419 (Fig. S5), but mostly mapped to a different set of transcriptomic clusters than the L4 SOM<sup>+</sup> cells  
420 (Fig. S5). These results identify five transcriptomic clusters from Tasic et al.<sup>18</sup> as L5 MCs, but  
421 the differences between these clusters remain unclear. We also found several SOM<sup>+</sup> cells,  
422 mostly in L4, that mapped to the *Sst Tac2* and *Sst Mme* transcriptomic clusters. Some of these  
423 cells had very distinct electrophysiological profile (Fig. 4E). Our results suggest that a fraction of  
424 MCs and NMCs in L4 can belong to these three transcriptomic types. The identity and the role  
425 of these cells remains to be explored in the future.

426

#### 427 **Circuit organization in L4: V1 vs. S1**

428 In terms of connectivity, both MCs in V1 and NMCs in S1 avoid connecting to each other (apart  
429 from forming gap junctions), and project to excitatory population in L4. Moreover, the axonal  
430 morphologies of these two cell types seemed to match the respective dendritic morphologies of  
431 their excitatory neuronal targets. In V1, axons of L4 MCs projected to L1 where they are  
432 potentially able to synapse onto the apical dendrites of L4 PYRs, similar to the pattern described  
433 in other cortical layers<sup>55,56</sup>. In S1, by contrast, axons of L4 NMCs were more localized, matching  
434 the more compact dendritic structure of stellate cells. This observation is in line with previous  
435 findings that the excitatory identity controls the survival and wiring of local interneurons<sup>57,58</sup>.  
436 Therefore, we hypothesize that the difference in SOM<sup>+</sup> cells between these two cortical areas  
437 might be a result of the difference in the population of excitatory neurons.

438

439 On the other hand, while we found that SOM<sup>+</sup> cells receive inputs from local excitatory neurons  
440 in S1 L4, in agreement with previous studies<sup>8,17</sup>, we did not detect connections from L4 PYRs to  
441 L4 MCs in V1. SOM<sup>+</sup> Martinotti cells in other layers are known to receive facilitating excitatory  
442 inputs from local principal neurons in both S1<sup>59,60</sup> and V1<sup>21,61</sup>. However, our results suggest  
443 that L4 MCs in V1 behave differently. Interestingly, previous studies have also shown that in V1,  
444 L4 MCs do not receive direct input from LGN<sup>14</sup>, while in L2/3 MCs do not receive input from L4  
445 excitatory neurons<sup>61</sup>. Together with our results, this suggests that MCs in V1 are not directly  
446 recruited in the feed-forward pathway. Further investigations are needed to test whether L4 MCs  
447 in V1 are driven by PYRs in other layers or by long-range inputs from other areas.

448

449 In addition to the connectivity among PYRs and MCs in V1 L4, we tested connectivity of BCs,  
450 another major cell type in L4 (Fig. S8). We found that BCs in L4 followed the same connectivity  
451 rules as described for basket cells in other layers<sup>21</sup> and in younger animals<sup>49</sup>: BCs inhibit other  
452 BCs, MCs, and pyramidal cells, are inhibited by MCs and excited by PYRs. All of these  
453 connections have also been reported in S1 L4 in young mice<sup>17</sup>, suggesting that the circuitry  
454 involving PV<sup>+</sup> cells is roughly conserved between these areas.

455

456 Finally, we found very low connection probability between PYRs in V1 L4, which was consistent  
457 with the findings in V1 L2/3 and V1 L5 of adult mice<sup>21</sup>, but much lower than what was reported  
458 in young animals<sup>62,63</sup>. We directly show that this difference in connection probability among  
459 excitatory neurons is due to the age of the animal (Fig. S9).

460

## 461 **Summary**

462 In conclusion, we revealed differences in the morphologies of excitatory cells and SOM<sup>+</sup>  
463 interneurons in L4 of V1 and S1 of adult mice. In each area, the morphology of SOM<sup>+</sup>

464 interneurons matched that of the excitatory neurons, opening the question of whether one of  
465 them adapts to another or whether both are caused by a common regulatory mechanism. We  
466 found differences in the connections from the excitatory population to the SOM<sup>+</sup> interneurons,  
467 suggesting a different functional role of SOM<sup>+</sup> interneurons across areas and arguing against a  
468 canonical local circuitry. In addition, we found that there is no one-to-one match between the  
469 morphological and the transcriptomic types of SOM<sup>+</sup> interneurons, highlighting the need of multi-  
470 modal profiling of neural types in the neocortex. Our results support the view that canonical  
471 circuit motifs, such as the Martinotti/pyramidal pair, are used as optional building blocks to  
472 assemble the neocortex, as opposed to a single canonical microcircuit repeated through all  
473 cortical areas.

## 474 **Methods**

### 475 **Data and code availability**

476 Patch-seq data will be made available at <https://www.ncbi.nlm.nih.gov/geo/>. Apart from the raw  
477 reads, it includes a table of read counts, a table of RPKM values, and a table of the extracted  
478 electrophysiological features.

479

480 The analysis code in Python will be available at <http://github.com/berenslab/L4-analysis>. This  
481 includes data analysis of electrophysiological recordings, data analysis of the morphological  
482 reconstructions, and data analysis of the transcriptomic data. This repository also includes a  
483 table of the extracted electrophysiological features for the morphological data set.

484

### 485 **Animals**

486 Experiments on adult male and female mice (>2 months old) were performed using wild-type  
487 ( $n=24$ ), *Viaat-Cre/Ai9* ( $n=47$ ), *Scnna1-Cre/Ai9* ( $n=5$ ), *SOM-Cre/Ai9* ( $n=14$ ), *VIP-Cre/Ai9* ( $n=8$ ),  
488 and *PV-Cre/Ai9* mice ( $n=31$ ). Crossing *Viaat-Cre* mice, that encode a transporter required for  
489 loading GABA and glycine, with *Ai9* reporter mice globally labels GABAergic interneurons with  
490 the fluorescence marker *tdTomato*<sup>30</sup>. *SOM-Cre/Ai9* mice, *VIP-Cre/Ai9* mice, and *PV-Cre/Ai9*  
491 mice have *SOM*<sup>+</sup> interneurons, *PV*<sup>+</sup> interneurons and *VIP*<sup>+</sup> interneurons labeled with the  
492 fluorescent marker *tdTomato* respectively. *Scnn1a-Cre/Ai9* mice have excitatory neurons in L4  
493 selectively labeled with *tdTomato*. Additional younger *Scnn1a-Cre/Ai9* mice (p15-p20,  $n=5$ ; p30-  
494 p40,  $n=5$ ) were used to study connectivity between excitatory neurons at the different ages.

495 Animal preparation procedures for animals maintenance and surgeries were performed  
496 according to protocols approved by the Institutional Animal Care and Use Committee (IACUC)  
497 of Baylor College of Medicine.

498

## 499 **Slice preparation**

500 Slice preparation followed methods previously described in Jiang et al. (2015). Briefly, animals  
501 were deeply anesthetized using 3% isoflurane. After decapitation, the brain was removed and  
502 placed into cold (0–4 °C) oxygenated NMDG solution containing 93 mM NMDG, 93 mM HCl, 2.5  
503 mM KCl, 1.2 mM NaH<sub>2</sub>PO<sub>4</sub>, 30 mM NaHCO<sub>3</sub>, 20 mM HEPES, 25 mM glucose, 5 mM sodium  
504 ascorbate, 2 mM Thiourea, 3 mM sodium pyruvate, 10mM MgSO<sub>4</sub> and 0.5 mM CaCl<sub>2</sub>, pH 7.35.  
505 300 µm thick parasagittal slices were cut and special care was taken to select only slices that  
506 had a cutting plane parallel to the apical dendrites to ensure preservation of both axonal and  
507 dendritic arborizations structures. The slices were incubated at 37.0±0.5 °C in oxygenated  
508 NMDG solution for 10-15 minutes before being transferred to the artificial cerebrospinal fluid  
509 solution (ACSF) containing: 125 mM NaCl, 2.5 mM KCl, 1.25 mM NaH<sub>2</sub>PO<sub>4</sub>, 25 mM NaHCO<sub>3</sub>, 1  
510 mM MgCl<sub>2</sub>, 25 mM glucose and 2 mM CaCl<sub>2</sub>, pH 7.4) for about 1 h. During recordings, slices  
511 were continuously perfused with oxygenated physiological solution throughout the recording  
512 session.

513

## 514 **Electrophysiological recordings**

515 Recordings were performed using patch recording pipettes (5–8 MΩ) filled with intracellular  
516 solution containing 120 mM potassium gluconate, 10 mM HEPES, 4 mM KCl, 4 mM MgATP, 0.3  
517 mM Na<sub>2</sub>GTP, 10 mM sodium phosphocreatine and 0.5% biocytin (pH 7.25). We used two Quadro  
518 EPC 10 amplifiers that allowed us to perform simultaneous recordings up to 8 cells. The  
519 PatchMaster software and custom-written Matlab-based programs were used to operate the  
520 Quadro EPC 10 amplifiers and perform online and offline analysis of the data. In order to extract  
521 information about passive electrical properties and firing patterns, neurons were stimulated with  
522 600 ms long current pulses starting from -100 / -200 pA with 20 pA step. The holding current was  
523 not always 0 pA. For patch-seq recordings, the holding current was always 0 pA and the initial  
524 current was always -200 pA.



525

526 To identify synaptic connections, current pulses were injected into the presynaptic neurons (2  
527 nA for 2 ms at 0.01–0.1 Hz) to evoke AP while post-synaptic membrane potential of other  
528 simultaneously recorded neurons were monitored to detect unitary inhibitory or excitatory  
529 postsynaptic potentials (ul(E)PSPs). The ulPSPs were measured while the membrane  
530 potentials of the putative postsynaptic cells were held at  $-60\pm 3$  mV, whereas uEPSPs were  
531 measured while membrane potentials of the putative postsynaptic cells were held at  $-70\pm 3$  mV.  
532 Paired-pulse ratio (PPR) was calculated as the ratio between the mean amplitude of the second  
533 and the first uEPSC obtained by injecting the presynaptic neuron with two consecutive stimuli of  
534 2nA with 100ms interval. We recorded 10-30 individual traces average of which was used to  
535 calculate ul(E)PSPs amplitude.

536 Neurons were assigned to L4 based on the neocortical layer boundaries and the identification of  
537 the small somata that characterize this granular layer, which were clearly visible in the  
538 micrograph under the bright-field microscope. The layer identity of each neuron was also  
539 confirmed post-hoc by the visualization of their position after the staining.

540

541 Because the synaptic connectivity significantly depends on the inter-soma distance (Jiang et al.,  
542 2015), we took special care to record from groups of neurons with inter-soma distances  
543 generally less than 200  $\mu\text{m}$ . To make sure that the identified connections were monosynaptic,  
544 we morphologically confirmed post-hoc the presynaptic neurons for all connections and made  
545 sure that the morphology and electrophysiology of the presynaptic neuron for each connection  
546 (i.e. pyramidal neurons vs. interneurons) matched the nature of connections (i.e. EPSP vs.  
547 IPSP). Indeed, the recovered morphology (i.e. pyramidal neurons vs. interneurons) and EPSP  
548 vs. IPSP always matched.

549

550 Importantly, as a consequence of slicing procedure, neuronal structures can be severed (a  
551 limitation of all slice electrophysiology experiments) due to the slicing procedure introducing a  
552 significant underestimation of the morphology of neurons and connectivity. However, this did not  
553 seem to strongly influence the study of local circuits in the past <sup>21,64</sup>.

554

### 555 **Staining and morphology recovery**

556 After the end of the patch-clamp recording, the slices were fixed by immersion in freshly-  
557 prepared 2.5% glutaraldehyde 4% paraformaldehyde in 0.1 M phosphate-buffered saline at 4°C  
558 for at least 72h. The slices were subsequently processed with the avidin-biotin-peroxidase  
559 method in order to reveal the morphology of the neurons. To increase the success rate in  
560 recovering the morphology of mature GABAergic interneurons, especially detail of their fine  
561 axonal arbors, we used additional modifications described in <sup>21,22</sup>. The morphologically  
562 recovered cells were examined and reconstructed using a 100X oil-immersion objective lens  
563 and a camera lucida system.

564

### 565 **Patch-seq procedure and sequencing**

566 To obtain electrophysiology and transcriptome data from single neurons, we used our recently  
567 described Patch-seq protocol <sup>22</sup> with the following additional modifications. Recording pipettes of  
568 5 MΩ resistance were filled with RNase-free intracellular solution containing: 101 mM potassium  
569 gluconate, 4 mM KCl, 10 mM HEPES, 0.2 mM EGTA, 4 mM MgATP, 0.3 mM Na<sub>3</sub>GTP, 5 mM  
570 sodium phosphocreatine, and 1 U/μl recombinant RNase inhibitor (Takara Cat.no. 2313A), pH  
571 ~7.25. The cDNA was amplified using 18 amplification cycles and the size distribution and  
572 concentration of the libraries were analyzed with an Agilent Bioanalyzer 2100. cDNA samples  
573 containing less than 1.5 ng total cDNA, or with an average size less than 1,500 bp were not  
574 sequenced (*n*=8 cells).

575

576 To construct the final sequencing libraries, 0.2 ng of purified cDNA from each sample was  
577 tagmented using the Illumina Nextera XT Library Preparation using  $\frac{1}{5}$  of the volumes stated in  
578 the manufacturer's recommendation. The DNA was sequenced from single end (75 bp) with  
579 standard Illumina Nextera i5 and i7 index primers (8 bp each) using an Illumina NextSeq500  
580 instrument. Investigators were blinded to cell type during library construction and sequencing.  
581  
582 Reads were aligned to the mouse genome (mm10 assembly) using STAR (v2.4.2a) with default  
583 settings. We only used read counts (and not RPKM values, number of reads per kilobase of  
584 transcript per million total reads) for all data analysis presented here, but for completeness we  
585 mention that RPKM values were computed using `rpkmforgenes`<sup>65</sup> and NCBI RefSeq gene  
586 and transcript models (downloaded on the 24th of June 2014).

587

### 588 **Data analysis of the morphological reconstructions**

589 Reconstructed morphologies of  $n=92$  cells were converted into SWC format and further  
590 analyzed using custom Python code (see the github repository linked above). Each cell was  
591 soma-centered and rotated such that the z coordinate (height) was oriented along the cortical  
592 depth and the x coordinate (width) was oriented along the first principal component of the xy  
593 point cloud, i.e. roughly corresponded to the cell's largest extent in the plane orthogonal to the  
594 cortical depth. For further analysis we computed and combined three different feature  
595 representations of each cell: the XZ density map, the 2D persistence image, and a set of  
596 morphometric statistics (see below).

597

#### 598 XZ density map

599 We sampled equidistant points with 100 nm spacing along each neurite and normalized the  
600 resulting point cloud such that the smallest coordinate across all points of all cells was 0 and the  
601 largest was 1<sup>66</sup>. The normalized point cloud was projected onto the xz-plane and binned into

602 100×100 bins spanning [-0.1, 1.1]. We smoothed the resulting density map by convolving it with  
603 a 11×11 bin Gaussian kernel with standard deviation  $\sigma=2$ . For the purposes of downstream  
604 analysis, we treated this as set of 10,000 features.

605

#### 606 2D persistence image

607 The persistence image is a fairly new morphological representation based on ideas from  
608 topology<sup>67</sup>. We briefly outline it here. Starting from each tip, one records “birth time” of each  
609 branch as the radial distance of the tip from the soma. While moving away from the tips towards  
610 the soma, at each branch-point the “younger” branch, i.e. the one with a smaller birth time, is  
611 “killed” and its “death time” is recorded. This results in a 2D point cloud of (*birth time*, *death*  
612 *time*) for each branch with only the longest branch surviving until the soma and having a death  
613 time of 0. We performed kernel density estimation of this point cloud using a 2D Gaussian  
614 kernel (`gaussian_kde` from the `scipy.stats` package with default settings). To create an  
615 image similar to the density map, we evaluated the density estimate on a 100×100 equidistant  
616 grid spanning a  $[0:max\_birth, 0:max\_death]$  rectangle. Here *max\_birth* and *max\_death* refer to  
617 the maxima across all cells (789  $\mu\text{m}$  and 757  $\mu\text{m}$  in our data respectively). For the purposes of  
618 downstream analysis, we treated this as set of 10,000 features.

619

#### 620 Morphometric statistics

621 For each cell we computed a set of 16 summary statistics: number of branch points, cell width,  
622 cell depth, cell height, number of tips, number of stems, total neurite length, maximal neurite  
623 length, maximum branch order, maximal segment length, average tortuosity, maximal tortuosity,  
624 average branch angle, maximal branch angle, average path angle, and maximal path angle.

625

626

#### 627 Pairwise classification

628 We followed the pipeline that we recently benchmarked elsewhere (Laternus et al. 2018;  
629 manuscript in preparation). As predictors for pairwise classification we used morphometric  
630 statistics, density map and persistence image. Due to the very high dimensionality of the density  
631 map and the persistence image, we reduced each of them to 10 principal components (for  
632 cross-validation, PCA was computed on each outer-loop training set separately, and the same  
633 transformation was applied to the corresponding outer-loop test set). This makes the final  
634 feature dimensionality equal to 36.

635

636 For classification, we used logistic regression regularized with elastic net. Regularization  
637 parameter alpha was fixed to 0.5, which is giving equal weights to the lasso and ridge penalties.  
638 We used nested cross-validation to choose the optimal value of the regularization parameter  
639 lambda and to obtain an unbiased estimate of the performance. The inner loop was performed  
640 using the `civisanalytics` Python wrapper around the `glmnet` library<sup>68</sup> that does K-fold  
641 cross-validation internally. We used 5 folds for the inner loop. We kept the default setting which  
642 uses the maximal value of lambda with cross-validated loss within one standard error of the  
643 lowest loss (`lambda_best`) to make the test-set predictions:

```
644     LogitNet(alpha=0.5, n_splits=5, random_state=42)
```

645 Note that the default behavior of `glmnet` is to standardize all predictors. The outer loop was 10  
646 times repeated stratified 5-fold cross-validation, as implemented in `scikit-learn` by

```
647     RepeatedStratifiedKFold(n_splits=5, n_repeats=10, random_state=43)
```

648 Outer-loop performance was assessed via test-set accuracy.

649

## 650 t-SNE

651 For the t-SNE visualization, we reduced density maps, persistence images, and morphometric  
652 statistics of the  $n=92$  cells to 10 principal components each. We scaled each set of 10 PCs by

653 the standard deviation of the respective PC1, to make three sets be roughly on the same scale.  
654 Then we stacked them together to obtain a 30-dimensional representation of each cell. Exact  
655 (non-approximate) t-SNE was run with perplexity 15, random initialisation with seed 42, and  
656 early exaggeration 4, using `scikit-learn` implementation:

```
657     TSNE(perplexity=15, method='exact',  
658         random_state=42, early_exaggeration=4)
```

659

### 660 **Automatic extraction of electrophysiological features**

661 Thirteen electrophysiological features were automatically extracted using Python scripts from  
662 the Allen Software Development Kit (<https://github.com/AllenInstitute/AllenSDK>) with additional  
663 modifications to account for our experimental paradigms (see the github repository linked  
664 above). An illustration of the feature extraction procedure for one exemplary neuron is shown in  
665 Fig. S1. Here we briefly specify how each feature was extracted.

666

667 The resting membrane potential and the input resistance were computed differently for the  
668 patch-clamp/morphology recordings and for the Patch-seq recordings, because of the  
669 differences in the stimulation protocol between these two sets of experiments. In the Patch-seq  
670 experiments, the current clamp value before each current stimulation was fixed at 0 pA for all  
671 cells. Consequently, we computed the resting membrane potential as the median membrane  
672 voltage before stimulation onset. Input resistance for each hyperpolarizing stimulation was  
673 calculated as the ratio of the maximum voltage deflection to the corresponding current value.  
674 We took the median of all hyperpolarizing currents as the final input resistance value. In  
675 contrast, in the patch-clamp/morphology experiments, the current clamp before current  
676 stimulation was not always fixed at 0 pA. For that reason we used linear regression (for  
677 robustness, random sample consensus regression, as implemented in `scikit-learn`) of the  
678 steady state membrane voltage onto the current stimulation value to compute the input

679 resistance (regression slope) and the resting membrane potential (regression intercept) (Fig.  
680 S1D). For this we used five highest hyperpolarizing currents (if there were fewer than five, we  
681 used those available).

682

683 To estimate the rheobase (minimum current needed to elicit any spikes), we used robust  
684 regression of the spiking frequency onto the stimulation current using the five lowest  
685 depolarizing stimulation currents with non-zero spike count (if there fewer than five, we used  
686 those available) (Fig. S1D). The point where the regression line crosses the *x*-axis gives the  
687 rheobase estimate. We restricted the rheobase estimate to be between the highest current  
688 clamp value eliciting no spikes and the lowest current clamp value eliciting at least one spike. In  
689 the rare cases when the regression line crossed the *x*-axis outside of this interval, the nearest  
690 edge of the interval was taken instead as the rheobase estimate.

691

692 The action potential (AP) threshold, AP amplitude, AP width, afterhyperpolarization (AHP),  
693 afterdepolarization (ADP), and the first spike latency were computed as illustrated in Fig. S1C,  
694 using the very first spike fired by the neuron. AP width was computed at the half AP height.  
695 The adaptation index (AI) is defined as the ratio of the second interspike interval to the first one  
696 (Fig. S1B). We took the median over the five lowest depolarizing current stimulation that elicited  
697 at least three spikes (if fewer than five were available, we used all of them).

698

699 The maximum number of spikes simply refers to the maximum number of spikes emitted in the  
700 600 ms stimulation window over all stimulation currents (Fig. S1A). The membrane time  
701 constant ( $\tau$ ) was computed as the time constant of the exponential fit to the first phase of  
702 hyperpolarization (median over all hyperpolarizing traces). Finally, the sag ratio is defined as the  
703 ratio of the maximum membrane voltage deflection to the steady state membrane voltage during  
704 the first (the lowest) hyperpolarizing current clamp stimulation.

705

## 706 **Data analysis of the electrophysiological features**

707 For the t-SNE visualization (Fig. 2B), we log-transformed the AI values because this feature had  
708 a strongly right-skewed distribution (Fig. S1). We also excluded ADP and latency; ADP  
709 because it was equal to zero for most neurons and rare cells with non-zero values appeared as  
710 isolated subpopulations in the t-SNE representation, and latency because it had high outliers  
711 among the FS types, also yielding isolated subpopulations. The remaining 11 features were z-  
712 scored and exact (non-approximate) t-SNE was run with perplexity 15 and random initialisation  
713 with seed 42 using `scikit-learn` implementation:

```
714     TSNE(perplexity=15, method='exact', random_state=42)
```

715 For pairwise classification, we used exactly the same procedure as described above for  
716 pairwise classification using the reconstructed morphologies (nested cross-validation with  
717 logistic regression regularized with elastic net). All 13 features were used, with log-transformed  
718 AI and log-transformed latency (as shown in Fig. S1).

719

## 720 **Data analysis of the RNA-seq data**

### 721 Quality control

722 The total number of sequenced cells was  $n=118$ . Five cells were excluded because the sum of  
723 counts across all genes (library size) was below 2000 (Fig. S3A). The remaining  $n=113$  cells  
724 were mapped to the full set of 133 transcriptomic clusters identified in Tasic et al. <sup>18</sup>; see below  
725 for the details. Following this, one cell was excluded because it had correlation above 0.4 to one  
726 of the non-neural clusters (Fig. S3B) and we considered it potentially contaminated with non-  
727 neural RNA. One cell was excluded because it mapped to one of the excitatory clusters, and  
728 three cells were excluded because they mapped to *Pvalb* clusters. All the remaining  $n=108$  cells  
729 mapped to the *Sst* clusters. Among those, five cells did not have good electrophysiological



730 recordings (the recordings were either lost or were of bad quality) and were excluded. This left  
731  $n=103$  cells for downstream analysis.

732

### 733 Mapping to the reference clusters

734 Using the count matrix of Tasic et al. ( $n=23,822$ ,  $d=45,768$ ), we selected 3000 “most variable”  
735 genes (see below). We then log-transformed all counts with  $\log_2(x+1)$  transformation and  
736 averaged the log-transformed counts across all cells in each of the 133 clusters, to obtain  
737 reference transcriptomic profiles of each cluster (133×3000 matrix). Out of these 3000 genes,  
738 2575 were present in the `mm10` reference genome that we used to align reads in our data (see  
739 above). We applied the same  $\log_2(x+1)$  transformation to the read counts of our cells, and for  
740 each cell computed Pearson correlation across the 2575 genes with all 133 Tasic et al. clusters.  
741 Each cell was assigned to the cluster to which it had the highest correlation.

742

### 743 Gene selection

744 To select “most variable” genes, we found genes that had, at the same time, high non-zero  
745 expression and high probability of near-zero expression<sup>69</sup>. Our procedure is described in more  
746 detail elsewhere<sup>48</sup>. Specifically, we excluded all genes that had counts of at least 32 in fewer  
747 than 10 cells. For each remaining gene we computed the mean  $\log_2$  count across all counts that  
748 were larger than 32 (non-zero expression,  $\mu$ ) and the fraction of counts that were smaller than  
749 32 (probability of near-zero expression,  $\tau$ ). Across genes, there was a clear inverse relationship  
750 between  $\mu$  and  $\tau$ , that roughly followed exponential law  $\tau \approx \exp(-\mu+a)$  for some horizontal offset  
751  $a$ . Using a binary search, we found a value  $b$  of this offset that yielded 3000 genes with  $\tau > \exp(-$   
752  $\mu+b) + 0.02$ . These 3000 genes were selected.

753

754 Sometimes an exponential law with decay factor  $d=1.5$  described the bulk of the gene  
755 population better. Then we used  $\tau > \exp(-1.5\mu+b) + 0.02$  as the selection criterion. This is  
756 always explicitly mentioned below.

757

#### 758 t-SNE

759 The t-SNE visualization of the whole Tasic et al. <sup>18</sup> dataset shown in Fig. S3C was taken from  
760 our previous work <sup>48</sup>. It was computed there using PCA initialization and perplexity combination  
761 of 50 and 500, following preprocessing steps of library size normalization (by converting counts  
762 to counts per million), feature selection (3000 most variable genes),  $\log_2(x+1)$  transformation,  
763 and reducing the dimensionality to 50 using PCA.

764

765 To make t-SNE visualization of the somatostatin part of the Tasic et al. dataset (Fig. 4B), we  
766 selected all cells from all *Sst* clusters apart from the very distinct *Sst Chodl* (20 clusters, 2701  
767 cells). Using these cells, we selected 500 most variable genes using the procedure described  
768 above with decay factor 1.5. We used the same preprocessing steps as above, perplexity 50,  
769 and initialised t-SNE with the respective coordinates from the full-dataset t-SNE, zero-centered  
770 and scaled to have the standard deviation of the first coordinate equal to 0.0001 <sup>48</sup>. This  
771 initialisation was only used for convenience as it makes the resulting t-SNE visualization  
772 “aligned” to the zoomed-in version of the full-dataset t-SNE.

773

#### 774 Mapping to t-SNE

775 For each of the  $n=103$  Patch-seq cells, we computed its Pearson correlation with each of the  
776 2701 reference cells across the 500 genes, most variable in the somatostatin part of the Tasic  
777 et al. data set (only 472 genes present in our data were used). Then we found 10 reference  
778 cells with the maximal correlation (10 “nearest neighbours” of our cell) and positioned our cell at  
779 the median t-SNE location of those 10 reference cells <sup>48</sup>.

780

781 Mapping to somatostatin clusters

782 The mapping of the  $n=103$  Patch-seq cells to the 20 somatostatin clusters (Fig. 4C, S3) was  
783 done exactly as the mapping to the full set of 133 clusters described above, but this time only  
784 using 500 genes, most variable in the somatostatin part of the Tasic et al. <sup>18</sup> data set (only 472  
785 genes present in our data were used).

786

787 Sparse reduced-rank regression

788 We used our implementation of sparse reduced-rank regression (RRR) described in detail  
789 elsewhere <sup>47</sup>. For the analysis shown in Fig. 4E, we selected 500 most variable genes as  
790 described above, using  $n=71$  cells from L4 (the remaining cells among  $n=103$  were from L5).  
791 The gene counts were converted to counts per million and  $\log_2(x+1)$ -transformed. The columns  
792 of the resulting  $71 \times 500$  expression matrix were standardized. All electrophysiological features  
793 were standardized as well. We used RRR with  $\alpha=0.5$ ,  $\lambda=1$ , and rank 2 (with “relaxed  
794 elastic net” <sup>47</sup>). Fig. 4E shows two standardized RRR components in the transcriptomic and in  
795 the electrophysiological spaces. Features are depicted as lines showing correlations of a feature  
796 with each of the two components. All features are shown in the electrophysiological space. Only  
797 genes selected by the model are shown in the transcriptomic space. Additionally, all non-  
798 selected genes that had root-sum-square correlation above 0.6 are shown with the dashed line.  
799 Only one gene (*Hpsc*) passed this threshold. This means that it was not selected by the model  
800 (other genes, correlated with it, were selected instead), but it had high correlation to the  
801 electrophysiological features. The value of R-squared and correlations between the components  
802 from electrophysiological and transcriptomic spaces shown in Fig. 4E are cross-validation  
803 estimates. We used hyperparameter values approximately maximizing cross-validated R-  
804 squared.

805 For Fig. S5F, we used all  $n=103$  cells. The procedure was identical.

806

807 **Supplementary figures**

808

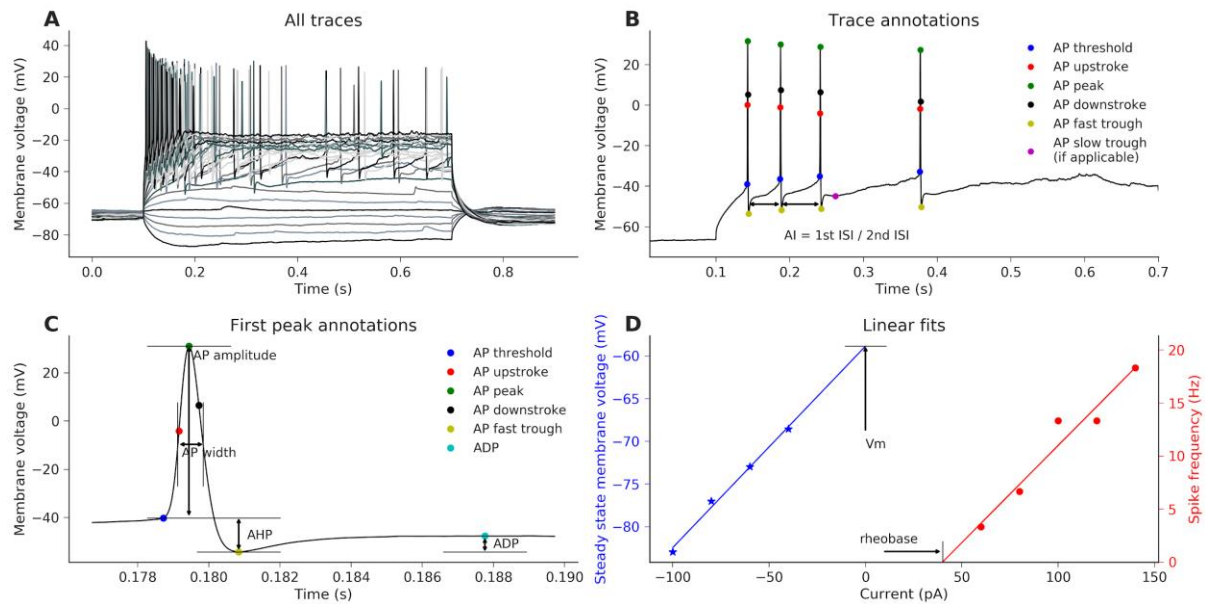

809

810 **Figure S1: Schematic of the electrophysiological features and the extraction algorithm.** All panels

811 show data from the same exemplary Martinotti cell. (A) Responses to the consecutive current clamp

812 stimulation currents. The maximum number of spikes elicited in 600 ms was 11. Hyperpolarizing currents

813 are used to compute sag ratio (1.3) and membrane time constant  $\tau$  (23.2 ms). (B) Zoom-in to one

814 particular trace in (A) showing trace annotations and AI (1.13). (C) Zoom-in to the first spike elicited by

815 this neuron. This action potential is used to compute AP threshold (-40.1 mV), AP amplitude (71.3 mV),

816 AP width (0.72 ms), AHP (-14.1 mV), ADP (6.6 mV), and latency of the first spike (78.7 ms) (D) Blue

817 regression line gives an estimate of resting membrane potential (-58.9 mV) and input resistance (235.8

818 M $\Omega$ ). Red regression line gives a rheobase estimate (40 pA).

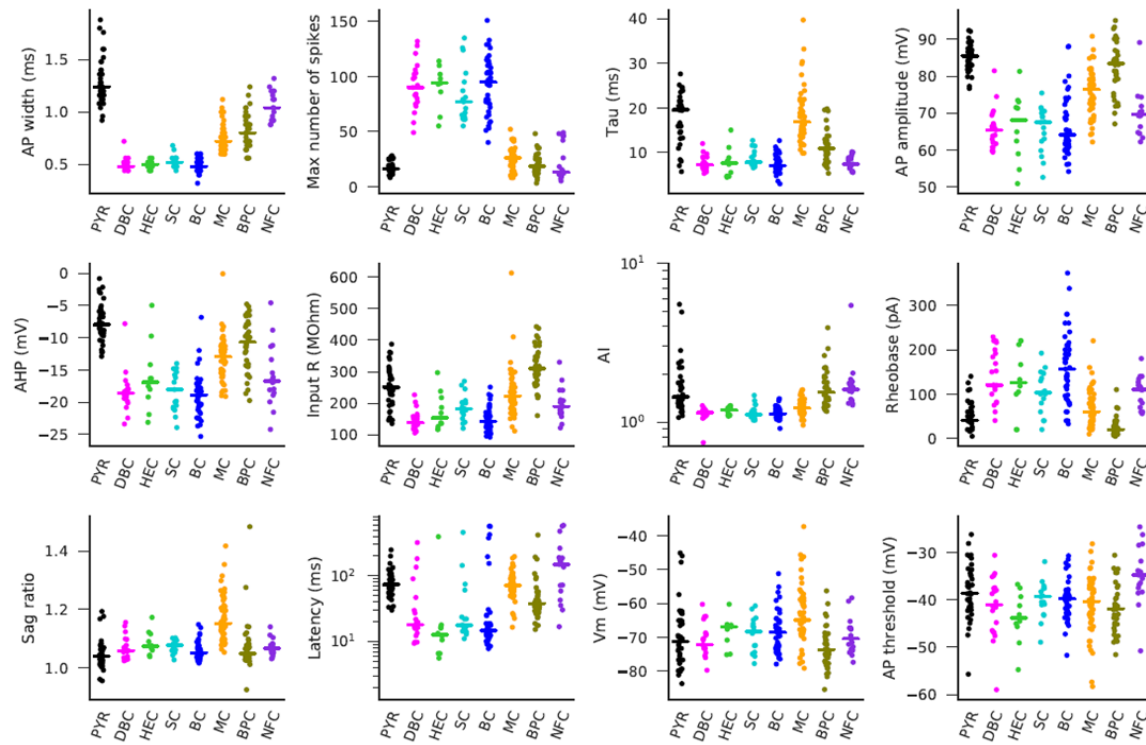

819

820 **Figure S2: Electrophysiological features of neural cell types in V1 L4.** Each panel shows one of the  
821 13 automatically extracted electrophysiological features for  $n=235$  neurons: action potential (AP) width,  
822 maximum number of spikes emitted during 600 ms of stimulation, membrane time constant tau, AP  
823 amplitude, afterhyperpolarization (AHP) depth, input resistance, adaptation index, rheobase, sag ratio,  
824 latency of the first spike, membrane potential, and AP threshold. Features are sorted by how strongly they  
825 varied between cell types (from the most strongly to the least strongly), as quantified by the Kruskal-  
826 Wallis test statistic. Horizontal lines show medians in each cell type. Afterdepolarization (ADP) height is  
827 not shown because its median was 0 for all cell types. See Fig. S1 for explanations of the feature.

Morphology of labeled neurons for mouse Cre line

| Cell type<br>Cre-line           | PYR              | BC                 | MC                | SC               | BPC               | NFC               | DBC               | HEC             | NMC              |
|---------------------------------|------------------|--------------------|-------------------|------------------|-------------------|-------------------|-------------------|-----------------|------------------|
| Viiat V1<br>(n=47)              | 11/245<br>(4.5%) | 88/245<br>(35.5%)  | 47/245<br>(20.4%) | 22/245<br>(8.9%) | 29/245<br>(11.4%) | 27/245<br>(11.0%) | 13/245<br>(4.8%)  | 8/245<br>(3.2%) | /                |
| PV V1<br>(n=31)                 | /                | 126/163<br>(77.3%) | /                 | 15/163<br>(9.2%) | /                 | /                 | 20/163<br>(12.2%) | 2/163<br>(1.2%) | /                |
| VIP V1<br>(n=8)                 | /                | /                  | /                 | /                | 26/26<br>(100%)   | /                 | /                 | /               | /                |
| SCNN1A<br>V1<br>p15/20<br>(n=5) | 17/17<br>(100%)  | /                  | /                 | /                | /                 | /                 | /                 | /               | /                |
| SCNN1A<br>V1<br>p30/40<br>(n=5) | 31/31<br>(100%)  | /                  | /                 | /                | /                 | /                 | /                 | /               | /                |
| SCNN1A<br>V1<br>>p 60<br>(n=5)  | 30/30<br>(100%)  | /                  | /                 | /                | /                 | /                 | /                 | /               | /                |
| SOM V1<br>(n=14)                | /                | 5/61<br>(8.2%)     | 56/61<br>(91.8%)  | /                | /                 | /                 | /                 | /               | /                |
| SOM S1<br>(n=24)                | /                | 1/79<br>(1.2%)     | 2/79<br>(2.5%)    | /                | /                 | /                 | /                 | /               | 76/79<br>(77.7%) |

828

829

830 **Figure S3. Morphological types of labeled neurons in different mouse Cre lines.**

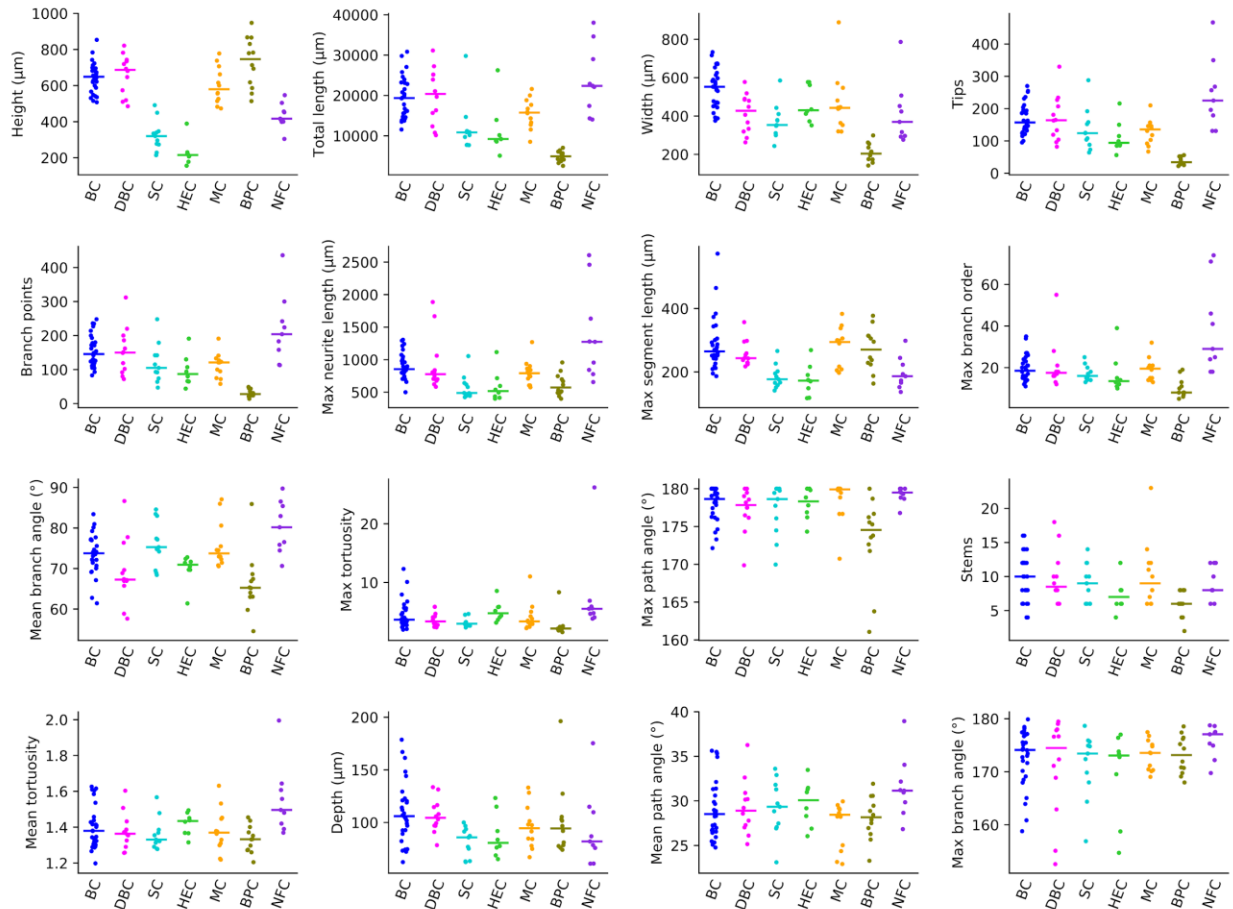

831  
 832 **Figure S4: Morphological features of neural cell types in V1 L4.** Each panel shows one of the 16  
 833 selected morphological summary statistics for  $n=92$  neurons: height (extent along the cortical depth), total  
 834 length of neurites, width (extent along the x-axis), number of tips, number of branch points, length of the  
 835 longest neurite from tip to soma, length of the longest segment, maximum branch order, mean branch  
 836 angle between two branches, maximum tortuosity, maximum path angle, number of stems extending from  
 837 the soma, mean tortuosity, depth (extent along the y-axis), mean path angle and maximum branch angle.  
 838 Features are sorted by how strongly they varied between cell types (from strongest to weakest), as  
 839 quantified by the Kruskal-Wallis test statistic. Horizontal lines show medians in each cell type.



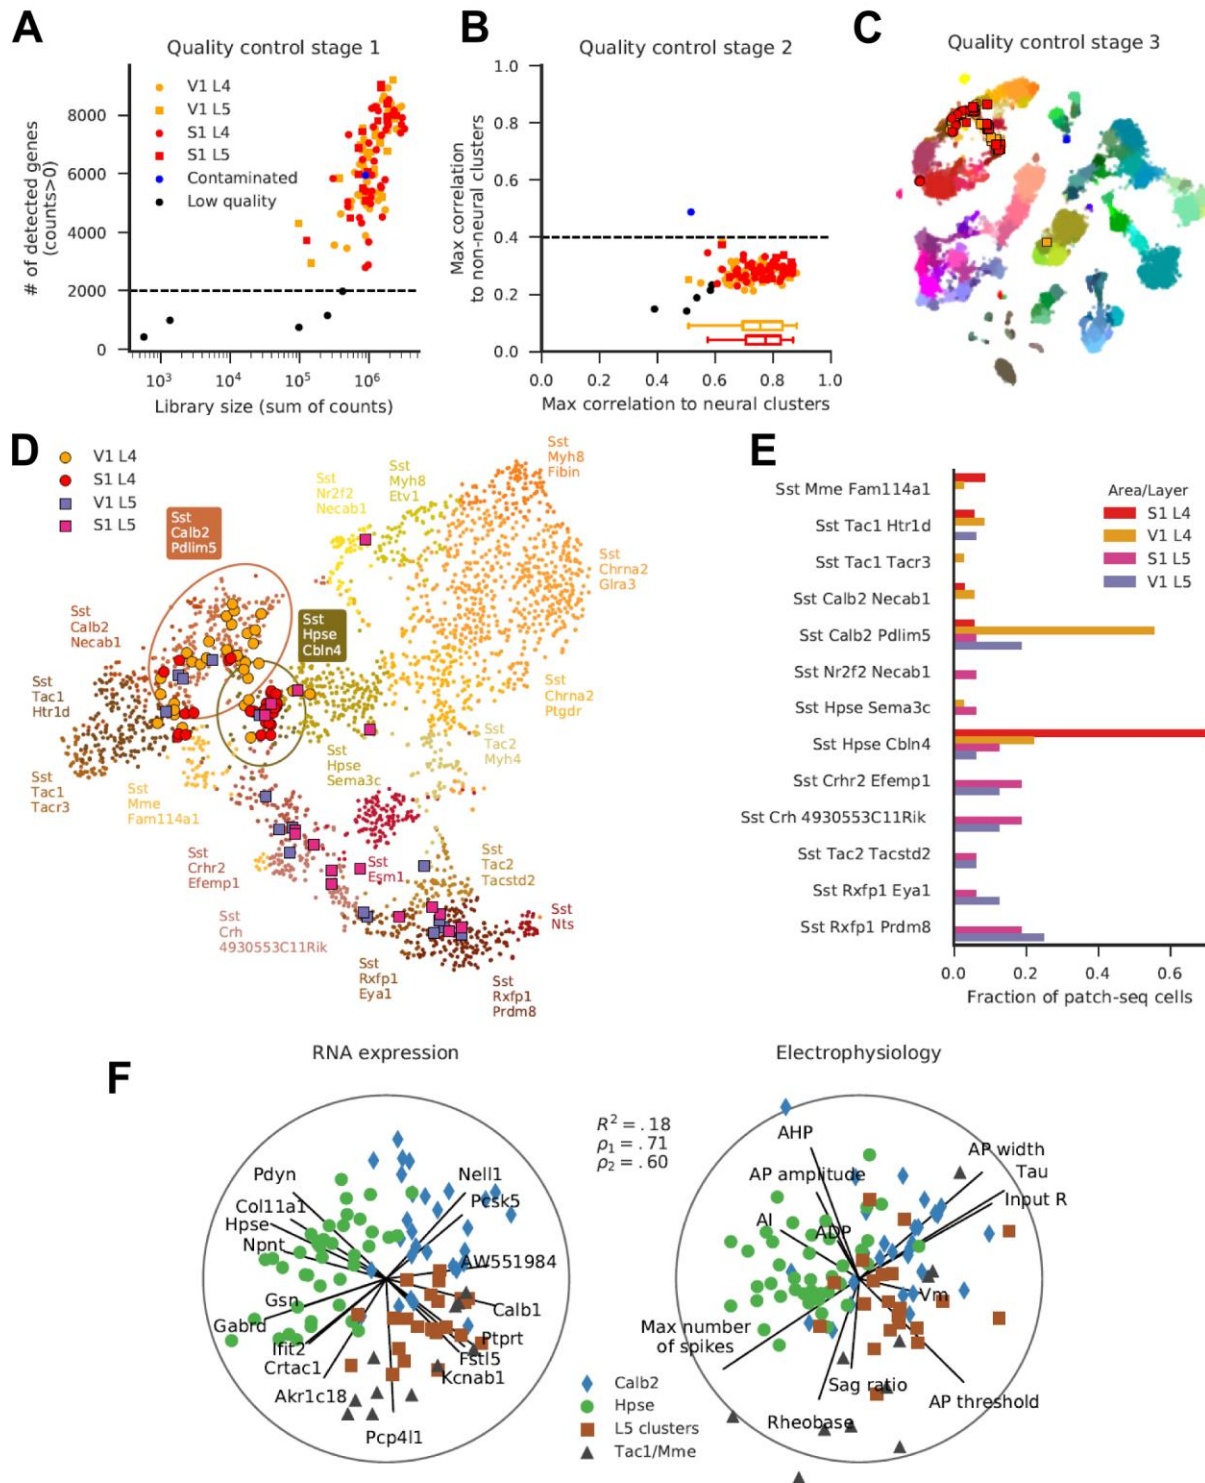

840

841 **Figure S5: Quality control and data analysis for Patch-seq data including L5 cells.** (A) Distribution  
 842 of library sizes (total sum of gene counts) and numbers of detected genes (number of positive counts) for  
 843 each sequenced cell ( $n=118$ ). Five cells with less than 2000 genes detected were excluded. (B) For each



844 cell, we found its maximal correlation to the cluster means of the Tasic et al. <sup>18</sup> dataset across all neural  
845 clusters (*x*-axis) and across all non-neural clusters (*y*-axis). One cell that had a maximal correlation to  
846 non-neural clusters above 0.4 (presumably due to non-neural contamination) was excluded. Boxplots  
847 show distribution of maximal correlation for V1 and S1 cells. Correlations were not lower for S1 cells,  
848 despite the fact that the Tasic et al. dataset only contained data from V1 and ALM. **(C)** All  $n=112$   
849 remaining cells were positioned on the t-SNE map of the Tasic et al. dataset. Three cells that mapped to  
850 Pvalb clusters and one cell that mapped to excitatory clusters were excluded. Five of the remaining cells  
851 did not have a good electrophysiological recording. This left  $n=103$  cells for further analysis. **(D)** Mapping  
852 of the Patch-seq cells ( $n=103$ ) to the t-SNE visualization of the transcriptomic diversity among  
853 somatostatin clusters from Tasic et al. See Fig. 4B. **(E)** Cluster assignment of the Patch-seq cells. See  
854 Fig. 4C. **(F)** Sparse reduced-rank regression analysis. See Fig. 4E.

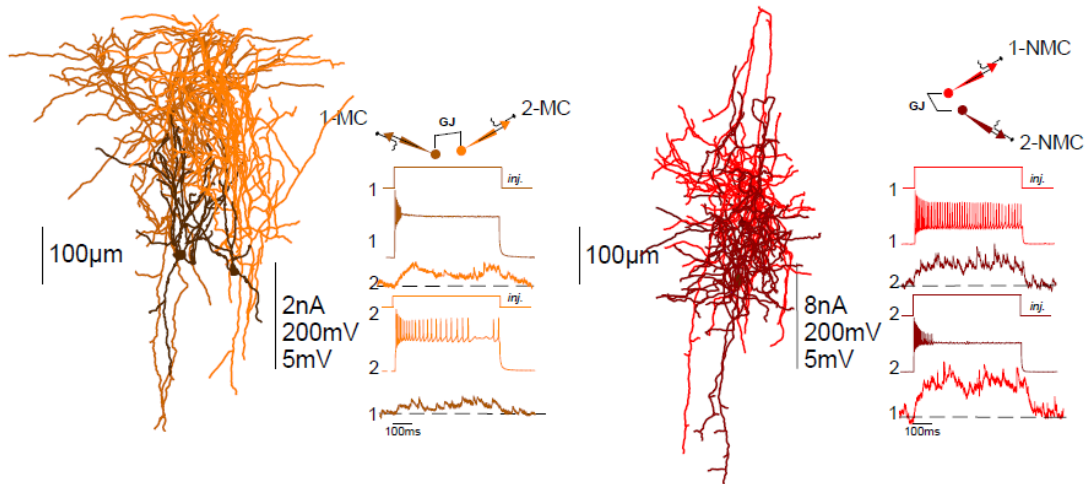

855

856

857 **Figure S6: Gap junctions are common between both MCs and NMCs.** Schematic representations of  
858 simultaneous recordings between L4 MCs in V1 (left) and L4 NMCs in S1 (right). Depolarizing current  
859 injections into either MC (left) or NMC (right) were transmitted to the other cell, confirming electrical  
860 coupling. The percentage of gap junctions was 23.5% in V1 (8/34) and 30.7% in S1 (8/26).

ul/EPSC (mV) in V1

| POST \ PRE | PYR                                 | BC                 | MC                 |
|------------|-------------------------------------|--------------------|--------------------|
| PYR        | $0.75 \pm 0.13$ mV<br>PPR=75.6±5.1% | $0.68 \pm 0.09$ mV | $0.50 \pm 0.07$ mV |
| BC         | $1.17 \pm 0.13$ mV<br>PPR=85.8±6.5% | $0.77 \pm 0.5$ mV  | $0.59 \pm 0.09$ mV |
| MC         | /                                   | $0.53 \pm 0.15$ mV | /                  |

ul/EPSC (mV) in V1 among age

|        | PYR-PYR                             |
|--------|-------------------------------------|
| p15/20 | $0.69 \pm 0.15$ mV<br>PPR=78.9±8.7% |
| p30/40 | $0.58 \pm 0.19$ mV<br>PPR=73.2±6.6% |
| >p 60  | $0.75 \pm 0.13$ mV<br>PPR=75.6±5.1% |

ul/EPSC (mV) in S1

| POST \ PRE | EXC                                  | NMCs               |
|------------|--------------------------------------|--------------------|
| EXC        | $0.99 \pm 0.12$ mV<br>PPR=87.2±4.0%  | $0.38 \pm 0.05$ mV |
| NMC        | $0.53 \pm 0.16$ mV<br>PPR=139.±17.0% | $0.19 \pm 0.05$ mV |

861

862 **Figure S7. Amplitudes of ul(E)psc.**

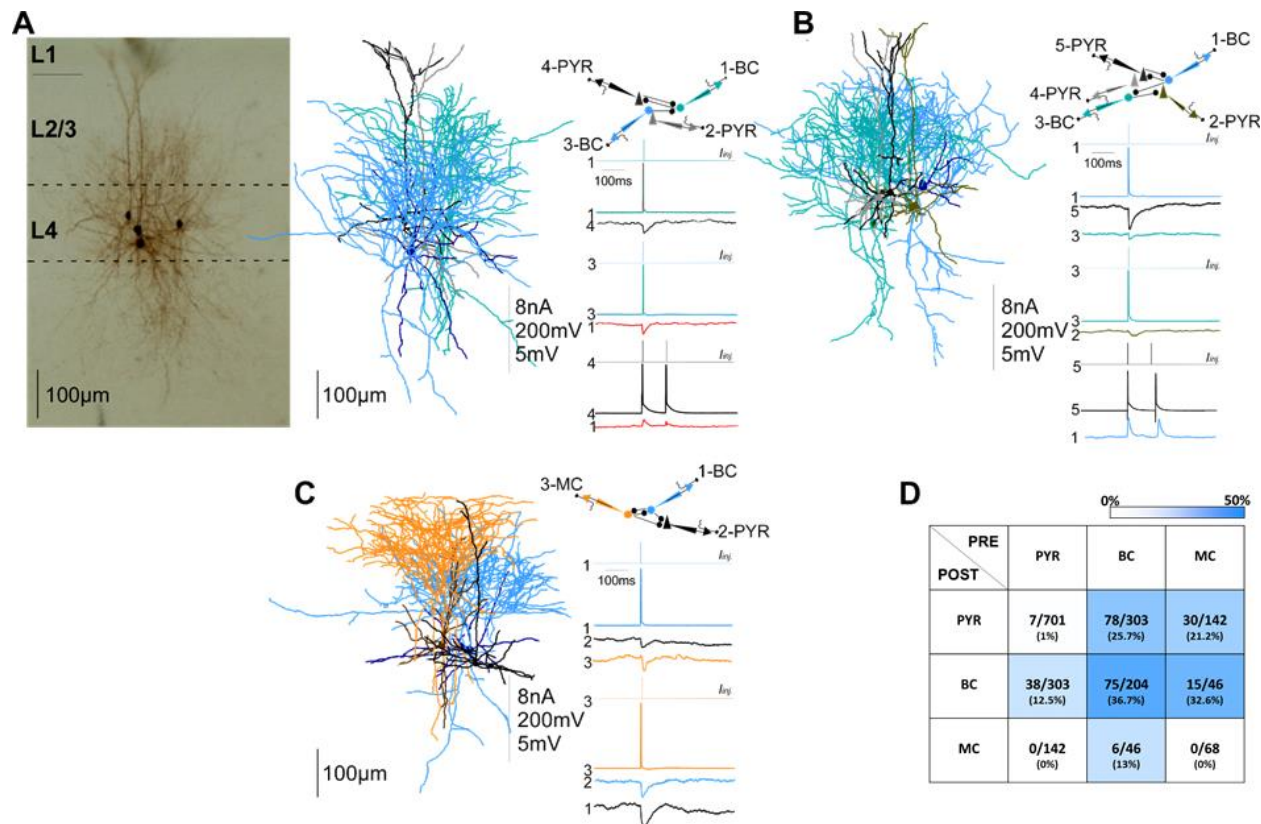

863

864 **Figure S8: Connectivity between L4 PYRs, BCs, and MCs in V1. (A)** On the left: Example of  
 865 morphological recovery of four neurons. Recorded neurons were close to each other (generally less than  
 866 200µm). On the right: connection diagram of the same neurons, including two BCs and two PYRs, and  
 867 their reconstructed morphology. Vertical scale bar indicates: amplitudes of injected current in nA,  
 868 amplitude of APs in mV and amplitude of uEPSP or uIPSP in mV. **(B)** Connections between five  
 869 simultaneously recorded neurons including three PYRs and two BCs. **(C)** Connections between three  
 870 simultaneously recorded neurons including one PYR, one BC and one MC. **(D)** Color coded connectivity  
 871 matrix showing the connection probabilities between PYRs, BCs and MCs computed as a fraction of all  
 872 tested connections. Average of uEPSP and uIPSP as well as PPR are reported in Fig. S7.

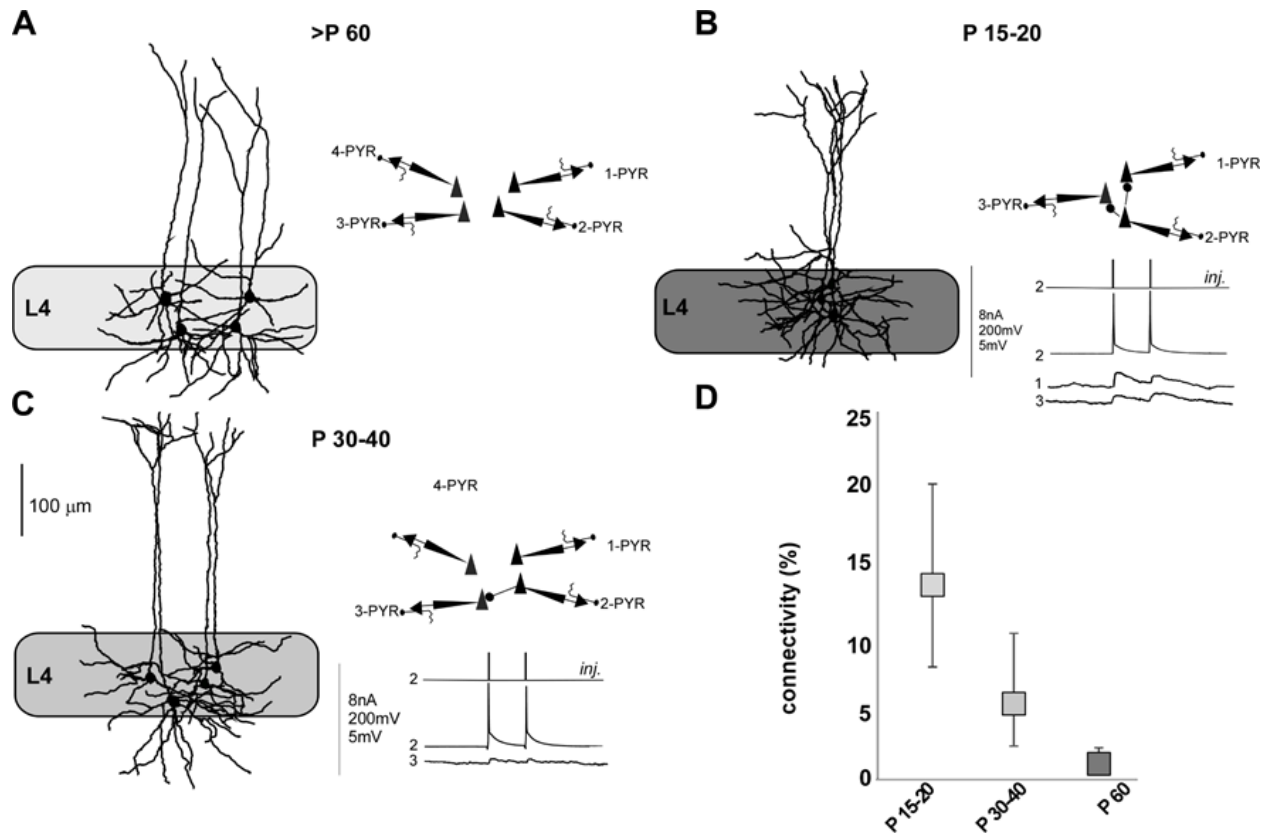

873

874

875 **Figure S9: Connectivity between PYRs in V1 L4 at different ages. (A-C)** Examples of simultaneously

876 recorded L4 neurons in >p60 (A), p15-20 (B), and p30-40 (C) mice. **(D)** Connectivity probability between

877 PYRs at different ages: 13.2% in p15-p20 (15/114), 5.1% in p30-p40 (8/156), and 1.0% in p60+ (7/701).

878 Error bars are 95% Clopper-Pearson confidence intervals.

## 879 **Acknowledgements**

880 Supported by the Intelligence Advanced Research Projects Activity (IARPA) via Department of  
881 Interior/Interior Business Center (DoI/IBC) contract number D16PC00003. The U.S.  
882 Government is authorized to reproduce and distribute reprints for Governmental purposes  
883 notwithstanding any copyright annotation thereon. The views and conclusions contained herein  
884 are those of the authors and should not be interpreted as necessarily representing the official  
885 policies or endorsements, either expressed or implied, of IARPA, DoI/IBC, or the U.S.  
886 Government.

887  
888 This work was also supported by the German Research Foundation (BE5601/4-1, EXC 2064,  
889 EXC 307, SFB1233), the Federal Ministry of Education and Research (FKZ 01GQ1601) and the  
890 National Institute of Mental Health and the National Institute of Neurological Disorders And  
891 Stroke under Award Number U19MH114830. The content is solely the responsibility of the  
892 authors and does not necessarily represent the official views of the National Institutes of Health.

893

## 894 **Author contributions**

895 FS and XJ performed electrophysiological recordings and manual neuronal reconstructions. DK  
896 directed the computational analysis. JC created full-length cDNA libraries and aided in  
897 morphological recovery. LH prepared the full-length cDNA libraries for sequencing and  
898 performed sequencing and initial bioinformatics analysis under the supervision of RS. ZT  
899 sustained animals' colonies and provided experimental support. SL did the morphological data  
900 analysis. YB did the electrophysiological data analysis. DK did the transcriptomic data analysis.  
901 FS, DK, SL, YB analyzed the data and produced the figures. FS, KD, SS, and CCR wrote the  
902 manuscript with input from PB. AT, XJ, and PB discussed and oversaw analysis and results. All  
903 authors also revised the manuscript.

904

## 905 **References**

- 906 1. Staiger, J. F. Functional Diversity of Layer IV Spiny Neurons in Rat Somatosensory Cortex:  
907 Quantitative Morphology of Electrophysiologically Characterized and Biocytin Labeled  
908 Cells. *Cereb. Cortex* **14**, 690–701 (2004).
- 909 2. Petersen, C. C. H. & Sakmann, B. The Excitatory Neuronal Network of Rat Layer 4 Barrel  
910 Cortex. *J. Neurosci.* **20**, 7579–7586 (2000).
- 911 3. Callaway, E. M. & Borrell, V. Developmental sculpting of dendritic morphology of layer 4  
912 neurons in visual cortex: influence of retinal input. *J. Neurosci.* **31**, 7456–7470 (2011).
- 913 4. Koelbl, C., Helmstaedter, M., Lübke, J. & Feldmeyer, D. A Barrel-Related Interneuron in  
914 Layer 4 of Rat Somatosensory Cortex with a High Intrabarrel Connectivity. *Cereb. Cortex*  
915 **25**, 713–725 (2013).
- 916 5. Emmenegger, V., Qi, G., Wang, H. & Feldmeyer, D. Morphological and Functional  
917 Characterization of Non-fast-Spiking GABAergic Interneurons in Layer 4 Microcircuitry of  
918 Rat Barrel Cortex. *Cereb. Cortex* **28**, 1439–1457 (2018).
- 919 6. Yavorska, I. & Wehr, M. Somatostatin-Expressing Inhibitory Interneurons in Cortical  
920 Circuits. *Front. Neural Circuits* **10**, (2016).
- 921 7. Ma, Y. Distinct Subtypes of Somatostatin-Containing Neocortical Interneurons Revealed in  
922 Transgenic Mice. *Journal of Neuroscience* **26**, 5069–5082 (2006).
- 923 8. Xu, H., Jeong, H.-Y., Tremblay, R. & Rudy, B. Neocortical somatostatin-expressing  
924 GABAergic interneurons disinhibit the thalamorecipient layer 4. *Neuron* **77**, 155–167  
925 (2013).
- 926 9. Cruikshank, S. J., Lewis, T. J. & Connors, B. W. Synaptic basis for intense thalamocortical  
927 activation of feedforward inhibitory cells in neocortex. *Nat. Neurosci.* **10**, 462–468 (2007).
- 928 10. Beierlein, M., Gibson, J. R. & Connors, B. W. Two Dynamically Distinct Inhibitory Networks  
929 in Layer 4 of the Neocortex. *J. Neurophysiol.* **90**, 2987–3000 (2003).

- 930 11. Higley, M. J. & Contreras, D. Balanced excitation and inhibition determine spike timing  
931 during frequency adaptation. *J. Neurosci.* **26**, 448–457 (2006).
- 932 12. Gabernet, L., Jadhav, S. P., Feldman, D. E., Carandini, M. & Scanziani, M. Somatosensory  
933 Integration Controlled by Dynamic Thalamocortical Feed-Forward Inhibition. *Neuron* **48**,  
934 315–327 (2005).
- 935 13. Kloc, M. & Maffei, A. Target-specific properties of thalamocortical synapses onto layer 4 of  
936 mouse primary visual cortex. *J. Neurosci.* **34**, 15455–15465 (2014).
- 937 14. Cruikshank, S. J., Urabe, H., Nurmikko, A. V. & Connors, B. W. Pathway-specific  
938 feedforward circuits between thalamus and neocortex revealed by selective optical  
939 stimulation of axons. *Neuron* **65**, 230–245 (2010).
- 940 15. Kawaguchi, Y. & Kubota, Y. GABAergic cell subtypes and their synaptic connections in rat  
941 frontal cortex. *Cereb. Cortex* **7**, 476–486 (1997).
- 942 16. Ikan, R. *Naturally Occurring Glycosides*. (Wiley, 1999).
- 943 17. Ma, Y., Hu, H. & Agmon, A. Short-term plasticity of unitary inhibitory-to-inhibitory synapses  
944 depends on the presynaptic interneuron subtype. *J. Neurosci.* **32**, 983–988 (2012).
- 945 18. Tasic, B. *et al.* Shared and distinct transcriptomic cell types across neocortical areas.  
946 *Nature* **563**, 72–78 (2018).
- 947 19. Nowakowski, T. J. *et al.* Regulation of cell-type-specific transcriptomes by microRNA  
948 networks during human brain development. *Nat. Neurosci.* **21**, 1784–1792 (2018).
- 949 20. Xu, X. *et al.* Primary visual cortex shows laminar-specific and balanced circuit organization  
950 of excitatory and inhibitory synaptic connectivity. *J. Physiol.* **594**, 1891–1910 (2016).
- 951 21. Jiang, X. *et al.* Principles of connectivity among morphologically defined cell types in adult  
952 neocortex. *Science* **350**, aac9462–aac9462 (2015).
- 953 22. Cadwell, C. R. *et al.* Multimodal profiling of single-cell morphology, electrophysiology, and  
954 gene expression using Patch-seq. *Nat. Protoc.* **12**, 2531–2553 (2017).
- 955 23. Cadwell, C. R. *et al.* Electrophysiological, transcriptomic and morphologic profiling of single



- 956 neurons using Patch-seq. *Nat. Biotechnol.* **34**, 199–203 (2016).
- 957 24. Fuzik, J. *et al.* Integration of electrophysiological recordings with single-cell RNA-seq data  
958 identifies neuronal subtypes. *Nat. Biotechnol.* **34**, 175–183 (2016).
- 959 25. Ramaswamy, S. & Markram, H. Anatomy and physiology of the thick-tufted layer 5  
960 pyramidal neuron. *Front. Cell. Neurosci.* **9**, 233 (2015).
- 961 26. Romand, S., Wang, Y., Toledo-Rodriguez, M. & Markram, H. Morphological Development  
962 of Thick-Tufted Layer V Pyramidal Cells in the Rat Somatosensory Cortex. *Front.*  
963 *Neuroanat.* **5**, (2011).
- 964 27. Kim, E. J., Juavinett, A. L., Kyubwa, E. M., Jacobs, M. W. & Callaway, E. M. Three Types of  
965 Cortical Layer 5 Neurons That Differ in Brain-wide Connectivity and Function. *Neuron* **88**,  
966 1253–1267 (2015).
- 967 28. Xue, M., Atallah, B. V. & Scanziani, M. Equalizing excitation–inhibition ratios across visual  
968 cortical neurons. *Nature* **511**, 596–600 (2014).
- 969 29. Harris, J. A. *et al.* Anatomical characterization of Cre driver mice for neural circuit mapping  
970 and manipulation. *Front. Neural Circuits* **8**, 76 (2014).
- 971 30. Chao, H. T. *et al.* Dysfunction in GABA signalling mediates autism-like stereotypies and  
972 Rett syndrome phenotypes. *Nature* **468**, 263–269 (2010).
- 973 31. Markram, H. *et al.* Interneurons of the neocortical inhibitory system. *Nat. Rev. Neurosci.* **5**,  
974 793–807 (2004).
- 975 32. Petilla Interneuron Nomenclature Group *et al.* Petilla terminology: nomenclature of features  
976 of GABAergic interneurons of the cerebral cortex. *Nat. Rev. Neurosci.* **9**, 557–568 (2008).
- 977 33. DeFelipe, J. *et al.* New insights into the classification and nomenclature of cortical  
978 GABAergic interneurons. *Nat. Rev. Neurosci.* **14**, 202–216 (2013).
- 979 34. Wang, Y. *et al.* Anatomical, physiological and molecular properties of Martinotti cells in the  
980 somatosensory cortex of the juvenile rat. *J. Physiol.* **561**, 65–90 (2004).
- 981 35. Le Bon-Jego, M. & Yuste, R. Persistently active, pacemaker-like neurons in neocortex.

- 982 *Front. Neurosci.* **1**, 123–129 (2007).
- 983 36. Buchanan, K. A. *et al.* Target-Specific Expression of Presynaptic NMDA Receptors in  
984 Neocortical Microcircuits. *Neuron* **75**, 451–466 (2012).
- 985 37. Wang, Y., Gupta, A., Toledo-Rodriguez, M., Wu, C. Z. & Markram, H. Anatomical,  
986 physiological, molecular and circuit properties of nest basket cells in the developing  
987 somatosensory cortex. *Cereb. Cortex* **12**, 395–410 (2002).
- 988 38. Muñoz, W., Tremblay, R. & Rudy, B. Channelrhodopsin-Assisted Patching: InVivo  
989 Recording of Genetically and Morphologically Identified Neurons throughout the Brain. *Cell*  
990 *Rep.* **9**, 2304–2316 (2014).
- 991 39. Lund, J. S., Henry, G. H., MacQueen, C. L. & Harvey, A. R. Anatomical organization of the  
992 primary visual cortex (area 17) of the cat. A comparison with area 17 of the macaque  
993 monkey. *J. Comp. Neurol.* **184**, 599–618 (1979).
- 994 40. Saint Marie, R. L. & Peters, A. The morphology and synaptic connections of spiny stellate  
995 neurons in monkey visual cortex (area 17): a Golgi-electron microscopic study. *J. Comp.*  
996 *Neurol.* **233**, 213–235 (1985).
- 997 41. Anderson, J. C., Douglas, R. J., Martin, K. A. & Nelson, J. C. Map of the synapses formed  
998 with the dendrites of spiny stellate neurons of cat visual cortex. *J. Comp. Neurol.* **341**, 25–  
999 38 (1994).
- 1000 42. Stratford, K. J., Tarczy-Hornoch, K., Martin, K. A. C., Bannister, N. J. & Jack, J. J. B.  
1001 Excitatory synaptic inputs to spiny stellate cells in cat visual cortex. *Nature* **382**, 258–261  
1002 (1996).
- 1003 43. Feldmeyer, D., Roth, A. & Sakmann, B. Monosynaptic connections between pairs of spiny  
1004 stellate cells in layer 4 and pyramidal cells in layer 5A indicate that lemniscal and  
1005 paralemniscal afferent pathways converge in the infragranular somatosensory cortex. *J.*  
1006 *Neurosci.* **25**, 3423–3431 (2005).
- 1007 44. Tasic, B. & Nicovich, P. R. Cell types behaving in their natural habitat. *Science* **362**, 749–

- 1008 750 (2018).
- 1009 45. Paul A, E. al. Transcriptional Architecture of Synaptic Communication Delineates  
1010 GABAergic Neuron Identity. - PubMed - NCBI. Available at:  
1011 <https://www.ncbi.nlm.nih.gov/pubmed/28942923>. (Accessed: 20th December 2018)
- 1012 46. Naka, A. *et al.* Complementary networks of cortical somatostatin interneurons enforce layer  
1013 specific control. (2018). doi:10.1101/456574
- 1014 47. Kobak, D., Weis, M. A. & Berens, P. Sparse reduced-rank regression for exploratory  
1015 visualization of single cell patch-seq recordings. (2018). doi:10.1101/302208
- 1016 48. Kobak, D. & Berens, P. The art of using t-SNE for single-cell transcriptomics. (2018).  
1017 doi:10.1101/453449
- 1018 49. Pfeffer, C. K., Xue, M., He, M., Huang, Z. J. & Scanziani, M. Inhibition of inhibition in visual  
1019 cortex: the logic of connections between molecularly distinct interneurons. *Nat. Neurosci.*  
1020 **16**, 1068–1076 (2013).
- 1021 50. Galarreta, M. & Hestrin, S. Electrical synapses between GABA-releasing interneurons. *Nat.*  
1022 *Rev. Neurosci.* **2**, 425–433 (2001).
- 1023 51. Markram, H., Lübke, J., Frotscher, M., Roth, A. & Sakmann, B. Physiology and anatomy of  
1024 synaptic connections between thick tufted pyramidal neurones in the developing rat  
1025 neocortex. *J. Physiol.* **500**, 409–440 (1997).
- 1026 52. Song, S., Sjöström, P. J., Reigl, M., Nelson, S. & Chklovskii, D. B. Correction: Highly  
1027 Nonrandom Features of Synaptic Connectivity in Local Cortical Circuits. *PLoS Biol.* **3**, e350  
1028 (2005).
- 1029 53. Gibson, J. R., Beierlein, M. & Connors, B. W. Two networks of electrically coupled inhibitory  
1030 neurons in neocortex. *Nature* **402**, 75–79 (1999).
- 1031 54. Gouwens, N. W. *et al.* Classification of electrophysiological and morphological types in  
1032 mouse visual cortex. *bioRxiv* 368456 (2018). doi:10.1101/368456
- 1033 55. Larkum, M. A cellular mechanism for cortical associations: An organizing principle for the

- 1034 cerebral cortex. *Trends Neurosci.* **36**, 141–151 (2013).
- 1035 56. Lovett-Barron, M. *et al.* Regulation of neuronal input transformations by tunable dendritic  
1036 inhibition. *Nat. Neurosci.* **15**, 423–30, S1–3 (2012).
- 1037 57. Lodato, S. *et al.* Excitatory Projection Neuron Subtypes Control the Distribution of Local  
1038 Inhibitory Interneurons in the Cerebral Cortex. *Neuron* **69**, 763–779 (2011).
- 1039 58. Wong, F. K. *et al.* Pyramidal cell regulation of interneuron survival sculpts cortical networks.  
1040 *Nature* **557**, 668–673 (2018).
- 1041 59. Kapfer, C., Glickfeld, L. L., Atallah, B. V. & Scanziani, M. Supralinear increase of recurrent  
1042 inhibition during sparse activity in the somatosensory cortex. *Nat. Neurosci.* **10**, 743–753  
1043 (2007).
- 1044 60. Silberberg, G. & Markram, H. Disynaptic inhibition between neocortical pyramidal cells  
1045 mediated by Martinotti cells. *Neuron* **53**, 735–746 (2007).
- 1046 61. Adesnik, H., Bruns, W., Taniguchi, H., Huang, Z. J. & Scanziani, M. A neural circuit for  
1047 spatial summation in visual cortex. *Nature* **490**, 226–231 (2012).
- 1048 62. Jiang, X. *et al.* Response to Comment on ‘Principles of connectivity among morphologically  
1049 defined cell types in adult neocortex’. *Science* **353**, 1108 (2016).
- 1050 63. Barth, A. *et al.* Comment on ‘Principles of connectivity among morphologically defined cell  
1051 types in adult neocortex’. *Science* **353**, 1108 (2016).
- 1052 64. Qi, G., Radnikow, G. & Feldmeyer, D. Electrophysiological and Morphological  
1053 Characterization of Neuronal Microcircuits in Acute Brain Slices Using Paired Patch-Clamp  
1054 Recordings. *J. Vis. Exp.* 21–27 (2015).
- 1055 65. Ramsköld, D., Wang, E. T., Burge, C. B. & Sandberg, R. An abundance of ubiquitously  
1056 expressed genes revealed by tissue transcriptome sequence data. *PLoS Comput. Biol.* **5**,  
1057 e1000598 (2009).
- 1058 66. Jefferis, G. S. X. E. *et al.* Comprehensive maps of *Drosophila* higher olfactory centers:  
1059 spatially segregated fruit and pheromone representation. *Cell* **128**, 1187–1203 (2007).

- 1060 67. Li, Y., Wang, D., Ascoli, G. A., Mitra, P. & Wang, Y. Metrics for comparing neuronal tree  
1061 shapes based on persistent homology. *PLoS One* **12**, e0182184 (2017).
- 1062 68. Friedman, J., Hastie, T. & Tibshirani, R. Regularization Paths for Generalized Linear  
1063 Models via Coordinate Descent. *J. Stat. Softw.* **33**, (2010).
- 1064 69. Andrews, T. S. & Hemberg, M. Dropout-based feature selection for scRNASeq. *bioRxiv*  
1065 065094 (2018). doi:10.1101/065094
